# Supplementary material for: Synthesis and Evaluation of the Acetylcholinesterase Inhibitory Activities of Some Flavonoids Derived from Naringenin
Source: Hindawi journal article supplement (doi:10.1155/2021/4817900), 2021-11-30

**Table S7. Spectral data of compound 7**

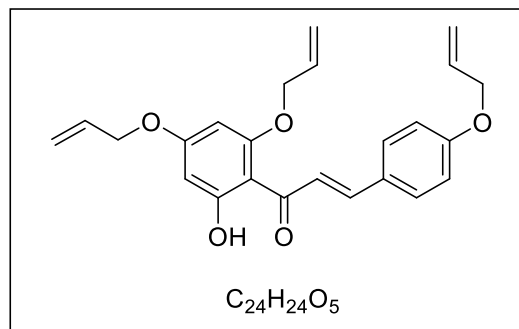

## UV

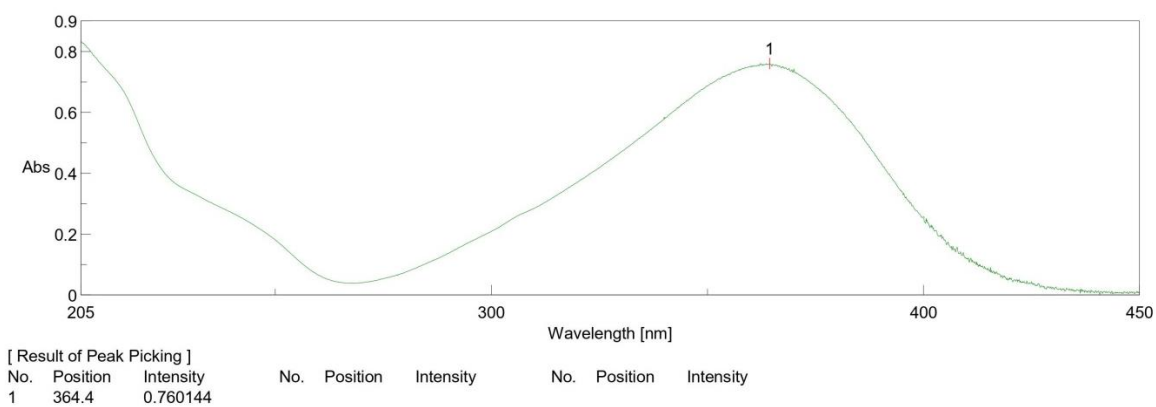

## IR

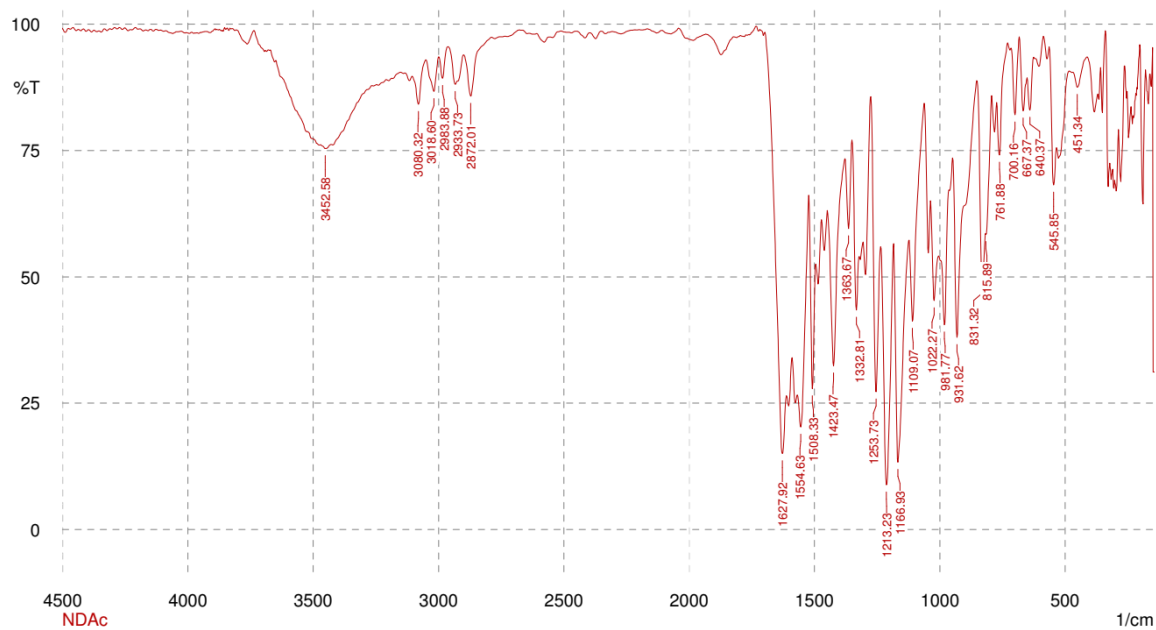

# HR-MS

## Qualitative Analysis Report

|                        |                       |                        |                                                       |
|------------------------|-----------------------|------------------------|-------------------------------------------------------|
| Data File              | NDAc.d                | Sample Name            | NDAc                                                  |
| Sample Type            | Sample                | Position               | P1-A7                                                 |
| Instrument Name        | Instrument 1          | User Name              |                                                       |
| Acq Method             | Cot ngan - MSMS_Pos.m | Acquired Time          | 01/07/2021 3:34:20 PM                                 |
| IRM Calibration Status | Success               | DA Method              | COTNGAN.M.m                                           |
| Comment                |                       |                        |                                                       |
| Sample Group           |                       | Info.                  |                                                       |
| Stream Name            | LC 1                  | Acquisition SW Version | 6200 series TOF/6500 series Q-TOF B.06.01 (B6172 SP1) |

## User Chromatograms

Fragmentor Voltage 140 Collision Energy 0 Ionization Mode ESI

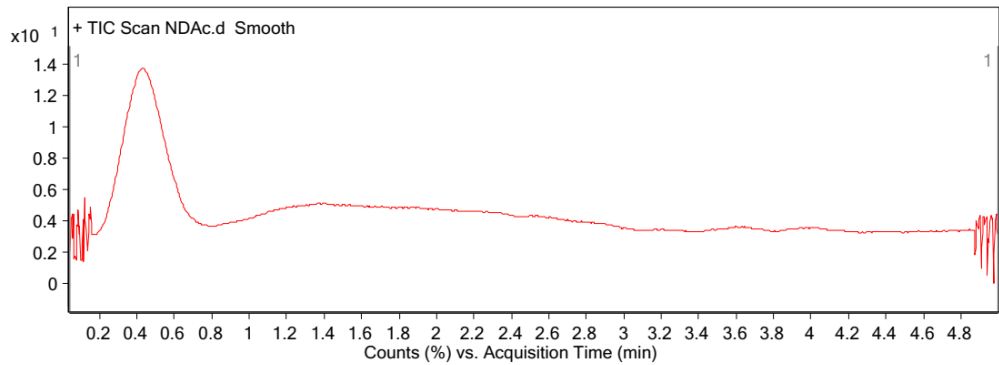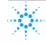

Agilent Technologies

Page 1 of 4

Printed at 12:06 AM on 2-Jul-2021

## Qualitative Analysis Report

## User Spectra

Fragmentor Voltage 140 Collision Energy 0 Ionization Mode ESI

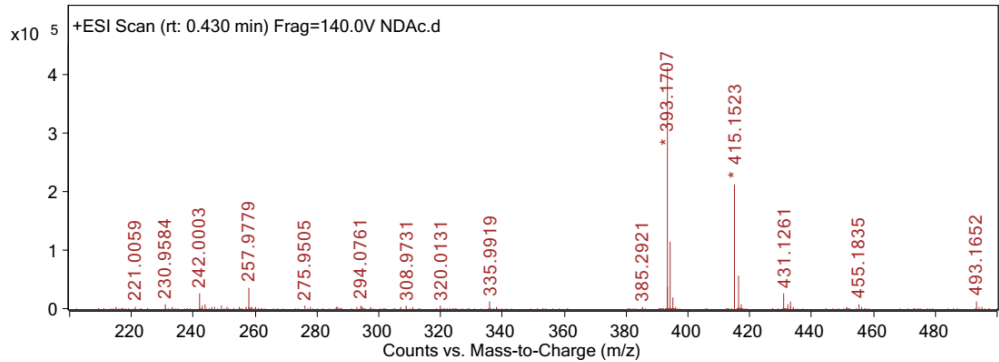

|                    |                       |                               |         |                        |                       |
|--------------------|-----------------------|-------------------------------|---------|------------------------|-----------------------|
| <b>Sample Name</b> | NDAc                  | <b>Position</b>               | P1-A7   | <b>Instrument Name</b> | Instrument 1          |
| <b>User Name</b>   |                       | <b>Inj Vol</b>                | 2       | <b>InjPosition</b>     |                       |
| <b>Sample Type</b> | Sample                | <b>IRM Calibration Status</b> | Success | <b>Data Filename</b>   | NDAc.d                |
| <b>ACQ Method</b>  | Cot ngan - MSMS_Pos.m | <b>Comment</b>                |         | <b>Acquired Time</b>   | 01/07/2021 3:34:20 PM |

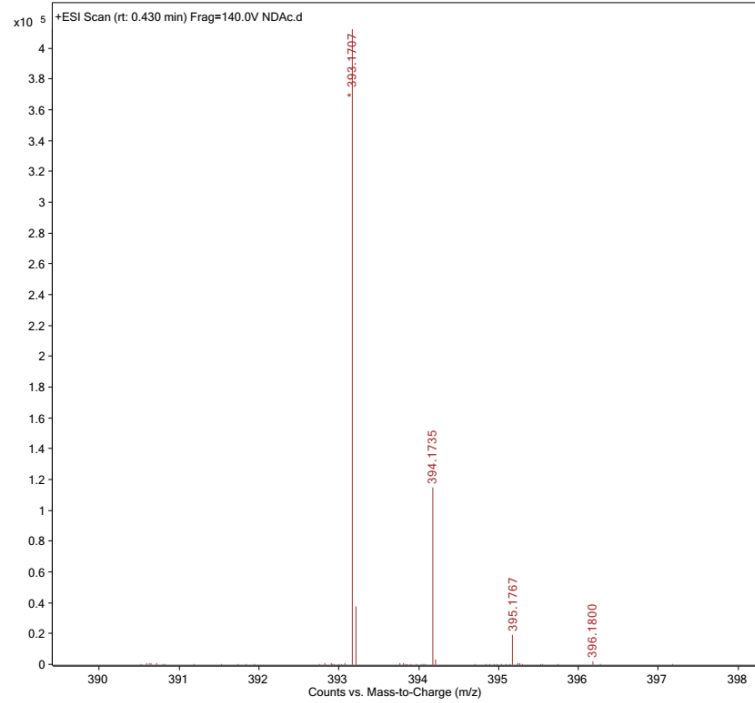

# $^1\text{H}$ -NMR

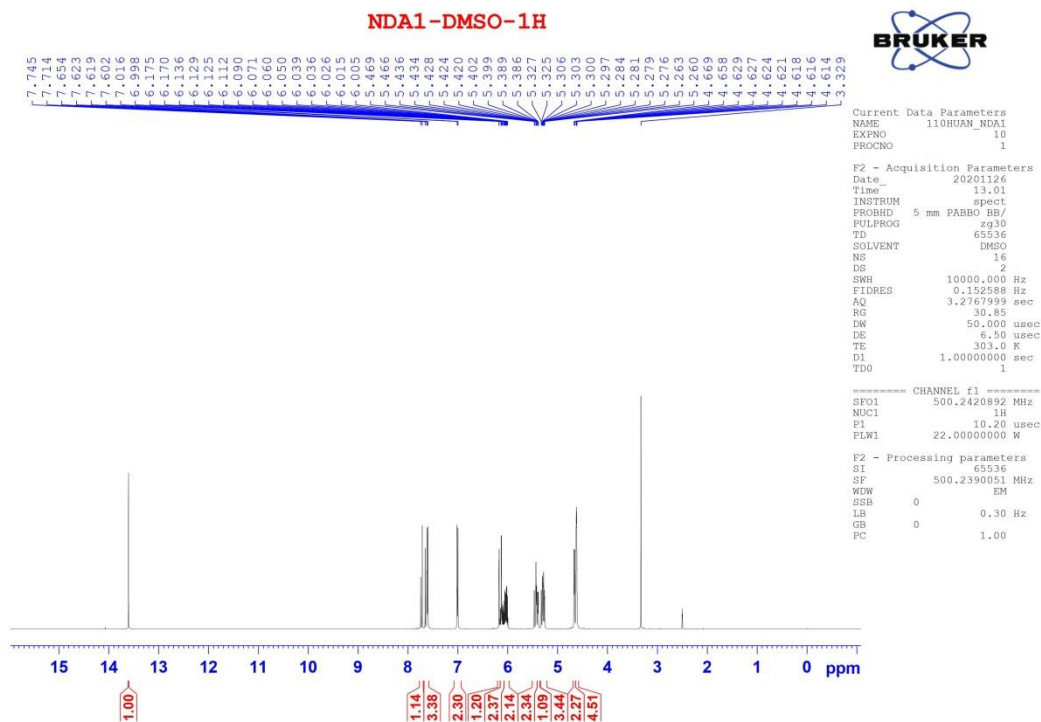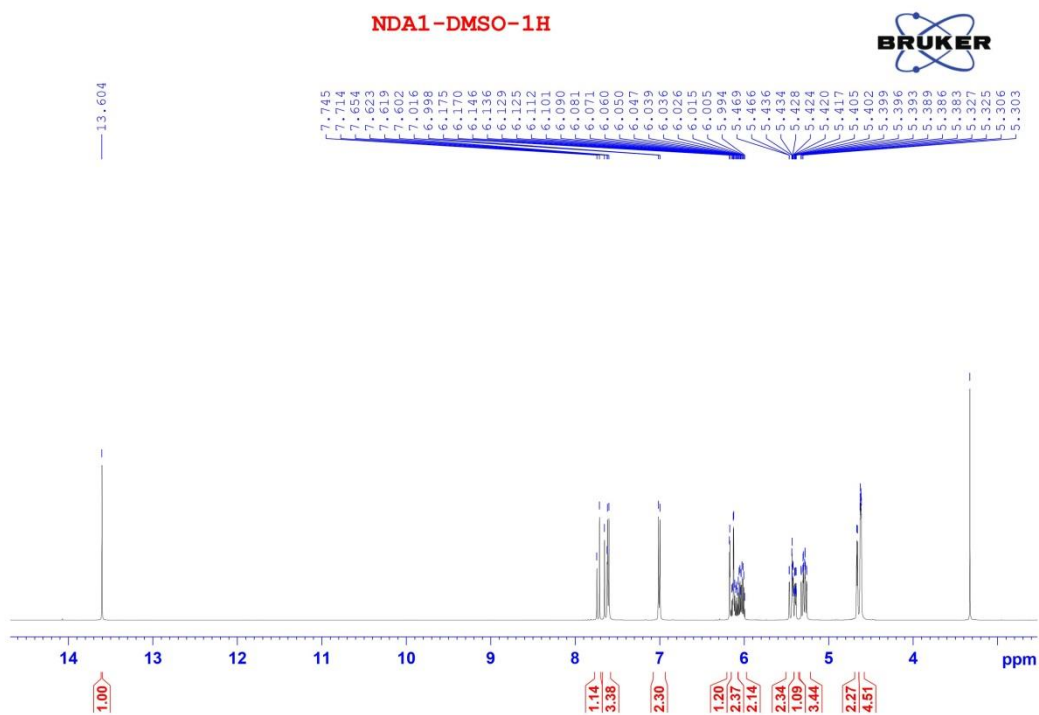

# $^{13}\text{C}$ -NMR

NDA1-DMSO-C13CPD

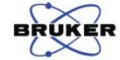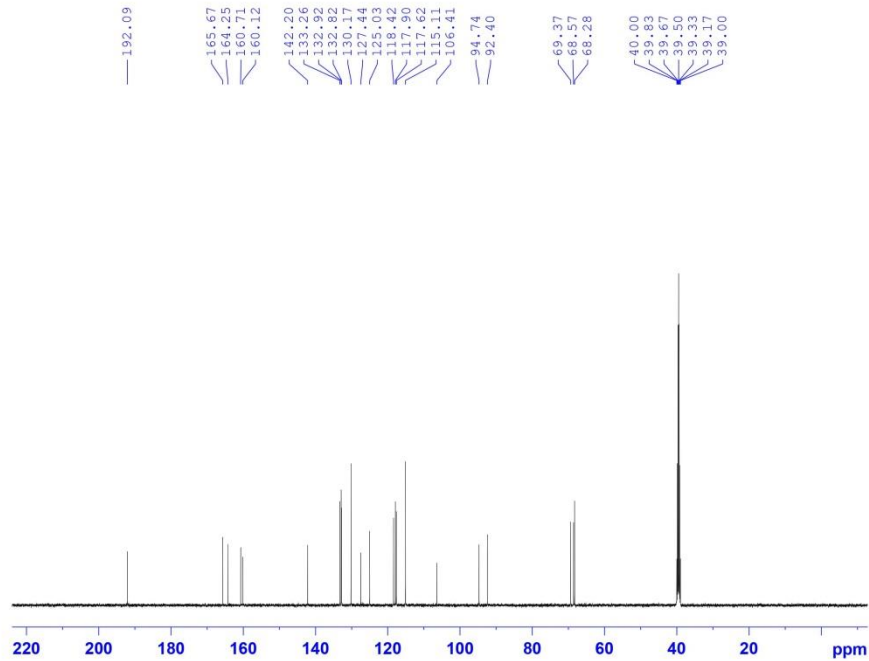

NDA1-DMSO-C13CPD

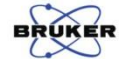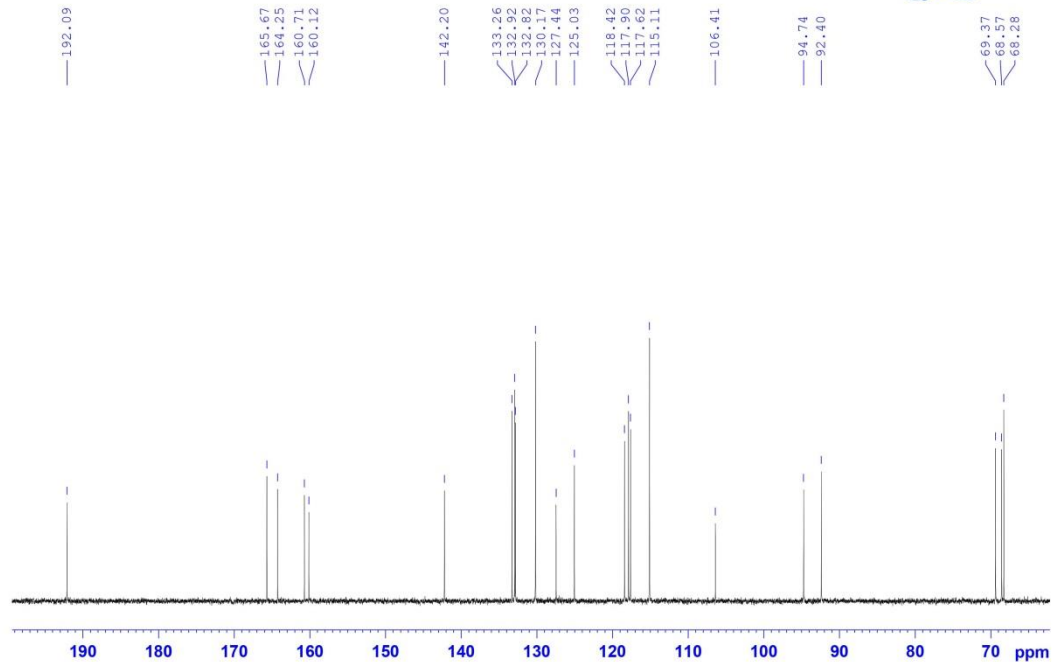

Supplement: f1 [file 4817900.f1.zip]
