# Supplementary material for: Synthesis and Evaluation of the Acetylcholinesterase Inhibitory Activities of Some Flavonoids Derived from Naringenin
Source: Hindawi journal article supplement (doi:10.1155/2021/4817900), 2021-11-30

**Table S4. Spectral data of compound 4**

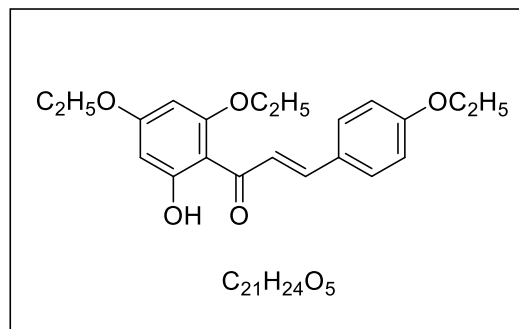

## UV

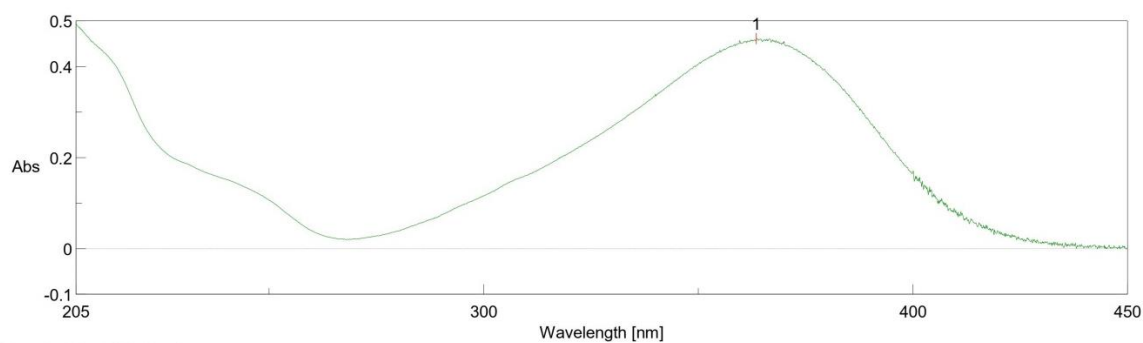

[ Result of Peak Picking ]

| No. | Position | Intensity |
|-----|----------|-----------|
| 1   | 363.5    | 0.461398  |

| No. | Position | Intensity |
|-----|----------|-----------|
|-----|----------|-----------|

| No. | Position | Intensity |
|-----|----------|-----------|
|-----|----------|-----------|

## IR

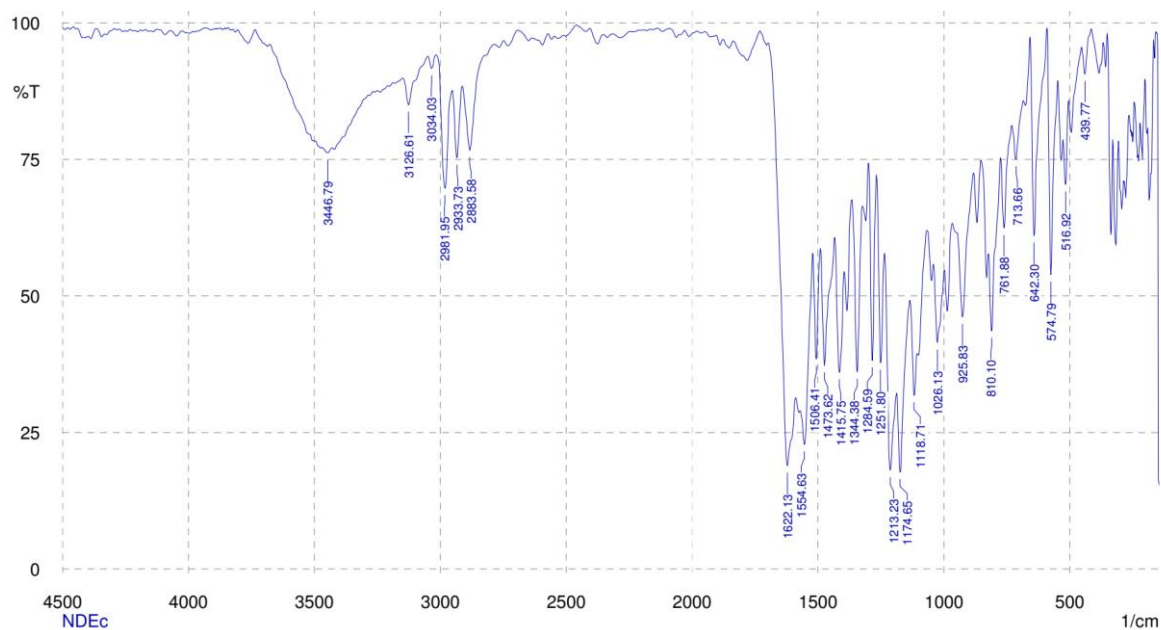

# HR-MS

## Qualitative Analysis Report

|                        |                       |                        |                                                       |
|------------------------|-----------------------|------------------------|-------------------------------------------------------|
| Data File              | NDEc.d                | Sample Name            | NDEc                                                  |
| Sample Type            | Sample                | Position               | P1-A4                                                 |
| Instrument Name        | Instrument 1          | User Name              |                                                       |
| Acq Method             | Cot ngan - MSMS_Pos.m | Acquired Time          | 01/07/2021 3:17:40 PM                                 |
| IRM Calibration Status | Success               | DA Method              | COTNGAN.M.m                                           |
| Comment                |                       | Info.                  |                                                       |
| Sample Group           |                       | Acquisition SW Version | 6200 series TOF/6500 series Q-TOF B.06.01 (B6172 SP1) |
| Stream Name            | LC 1                  |                        |                                                       |

## User Chromatograms

Fragmentor Voltage 140 Collision Energy 0 Ionization Mode ESI

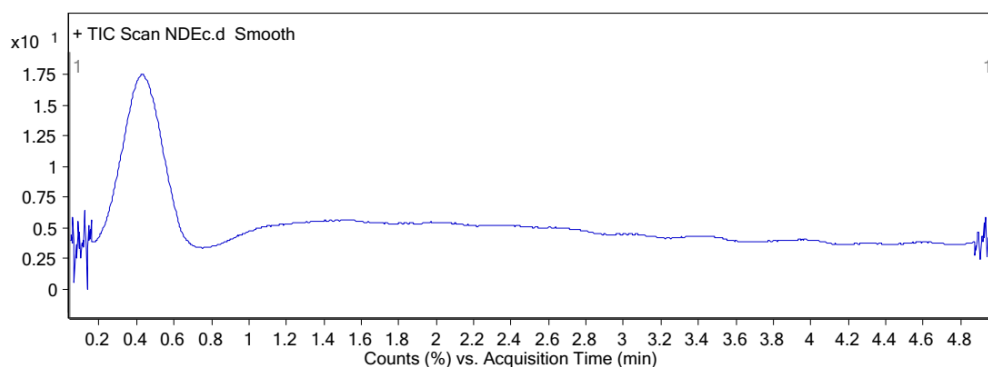

## Qualitative Analysis Report

## User Spectra

Fragmentor Voltage 140 Collision Energy 0 Ionization Mode ESI

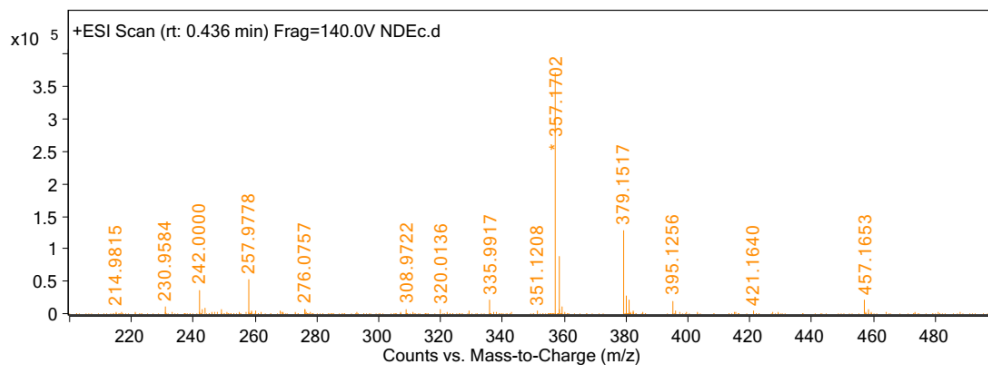

|             |                       |                        |         |                 |                       |
|-------------|-----------------------|------------------------|---------|-----------------|-----------------------|
| Sample Name | NDEc                  | Position               | P1-A4   | Instrument Name | Instrument 1          |
| User Name   |                       | Inj Vol                | 2       | InjPosition     |                       |
| Sample Type | Sample                | IRM Calibration Status | Success | Data Filename   | NDEc.d                |
| ACQ Method  | Cot ngan - MSMS_Pos.m | Comment                |         | Acquired Time   | 01/07/2021 3:17:40 PM |

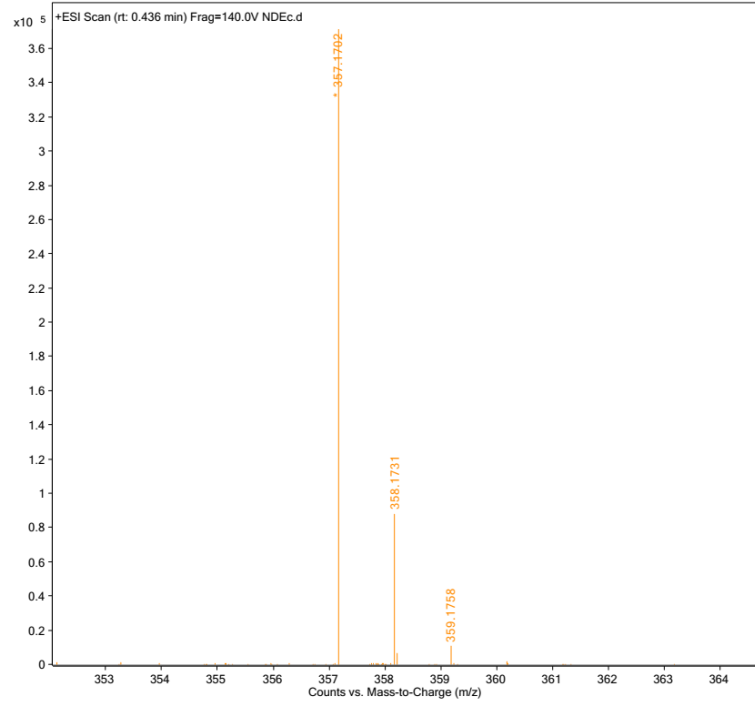

# $^1\text{H}$ -NMR

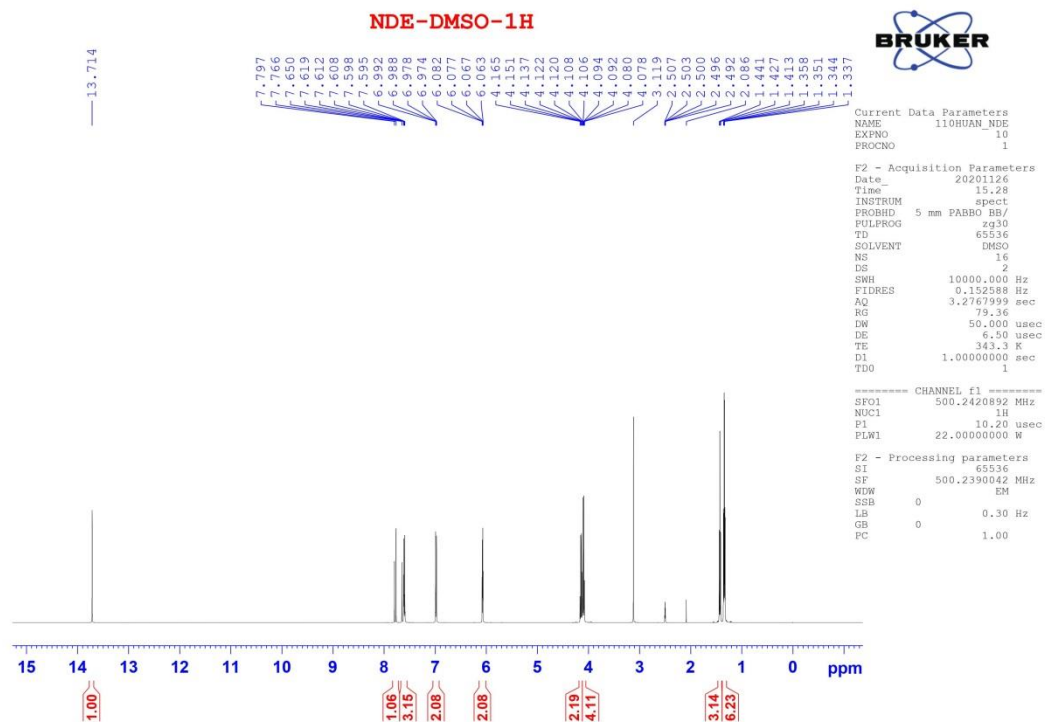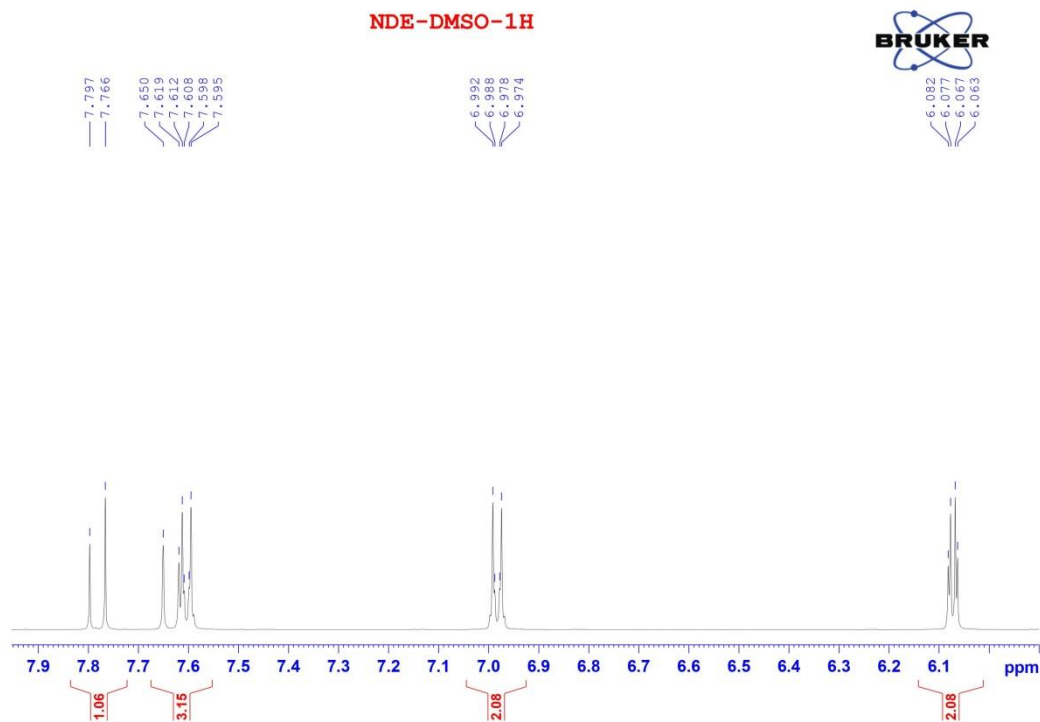

# $^{13}\text{C}$ -NMR

NDE-DMSO-C13CPD

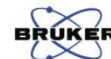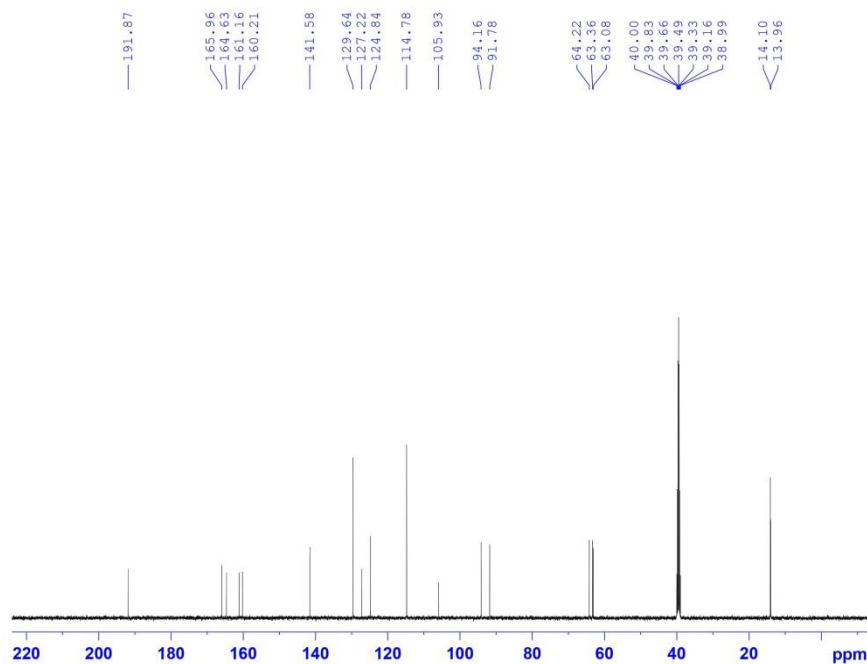

Current Data Parameters  
NAME 11GHUAN\_NDE  
EXPNO 2  
PROCNO 1

F2 - Acquisition Parameters  
Date\_ 20201126  
Time 15.38  
INSTRUM spect  
PROBHD 5 mm PABBO BB/  
PULPROG zgpg30  
TD 65536  
SOLVENT DMSO  
NS 128  
DS 4  
SWH 31250.000 Hz  
FIDRES 0.476837 Hz  
AQ 1.0485760 sec  
RG 198.57  
DM 16.000 usec  
DE 6.50 usec  
TE 343.0 K  
D1 2.00000000 sec  
D11 0.03000000 sec  
TD0 1

===== CHANNEL f1 =====  
SFO1 125.7990330 MHz  
NUC1 13C  
P1 10.00 usec  
PLW1 88.00000000 W

===== CHANNEL f2 =====  
SFO2 500.2410010 MHz  
NUC2 1H  
CPDPRG[2] waltz16  
PCPD2 80.00 usec  
PLM2 22.00000000 W  
PLM12 0.35764000 W  
PLM13 0.17989001 W

F2 - Processing parameters  
SI 32768  
SF 125.7853020 MHz  
WDW EM  
SSB 0  
LB 1.00 Hz  
GB 0  
PC 1.40

NDE-DMSO-C13CPD

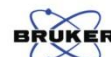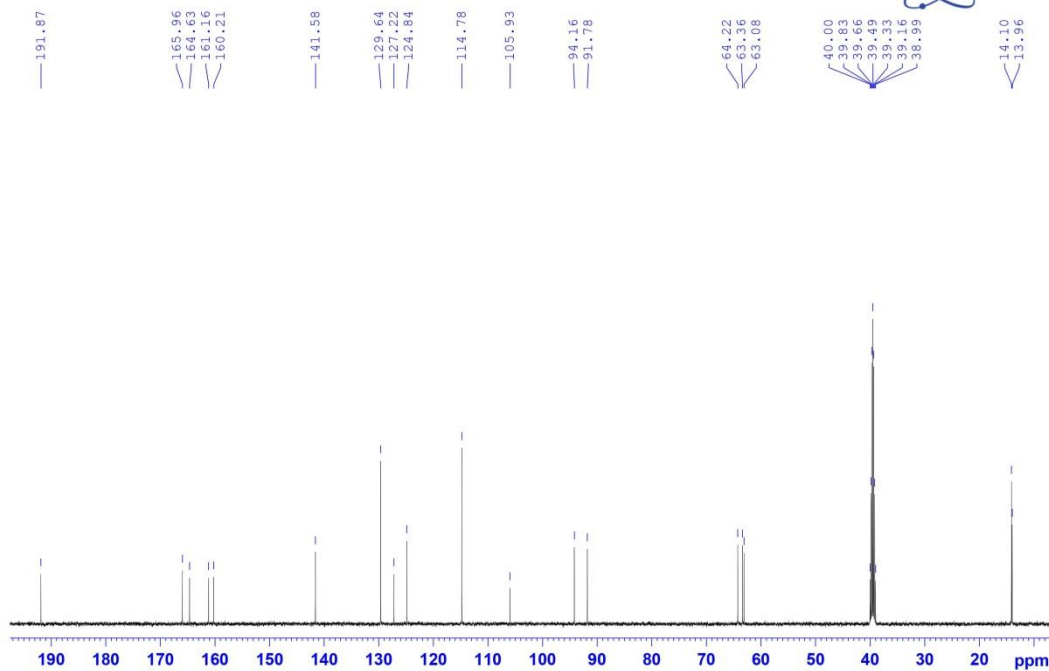

Supplement: f1 [file 4817900.f1.zip]
