# Supplementary material for: Synthesis and Evaluation of the Acetylcholinesterase Inhibitory Activities of Some Flavonoids Derived from Naringenin
Source: Hindawi journal article supplement (doi:10.1155/2021/4817900), 2021-11-30

Table S3. Spectral data of compound 3

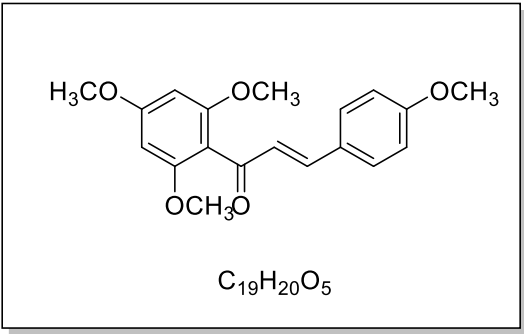

UV

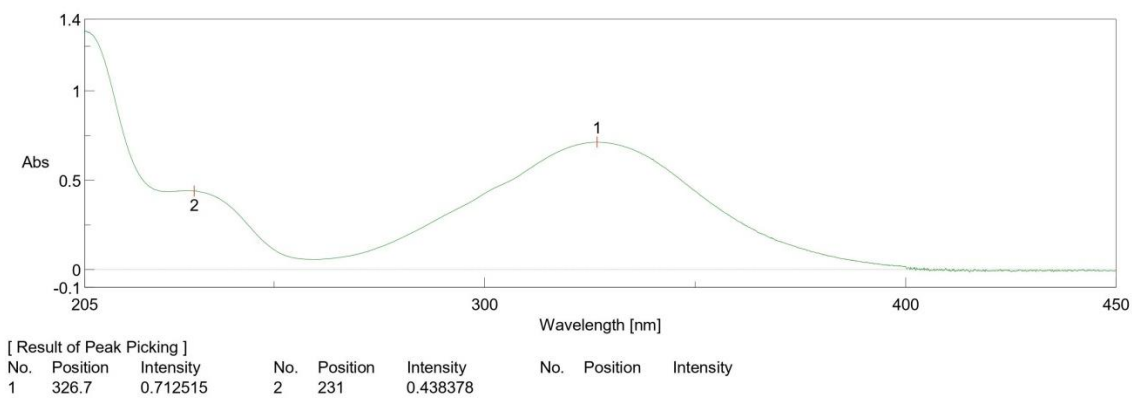

IR

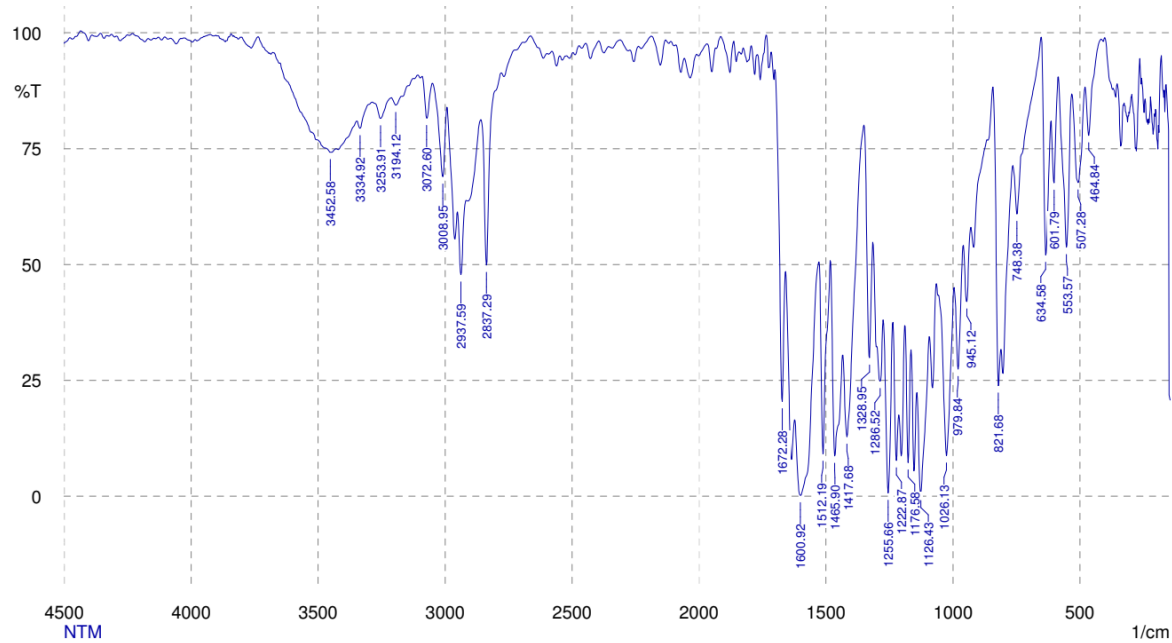

# HR-MS

## Qualitative Analysis Report

|                        |                       |                        |                                                       |
|------------------------|-----------------------|------------------------|-------------------------------------------------------|
| Data File              | NTMc.d                | Sample Name            | NTMc                                                  |
| Sample Type            | Sample                | Position               | P1-A3                                                 |
| Instrument Name        | Instrument 1          | User Name              |                                                       |
| Acq Method             | Cot ngan - MSMS_Pos.m | Acquired Time          | 01/07/2021 3:12:06 PM                                 |
| IRM Calibration Status | Success               | DA Method              | COTNGAN.M.m                                           |
| Comment                |                       |                        |                                                       |
| Sample Group           |                       | Info.                  |                                                       |
| Stream Name            | LC 1                  | Acquisition SW Version | 6200 series TOF/6500 series Q-TOF B.06.01 (B6172 SP1) |

## User Chromatograms

Fragmentor Voltage 140 Collision Energy 0 Ionization Mode ESI

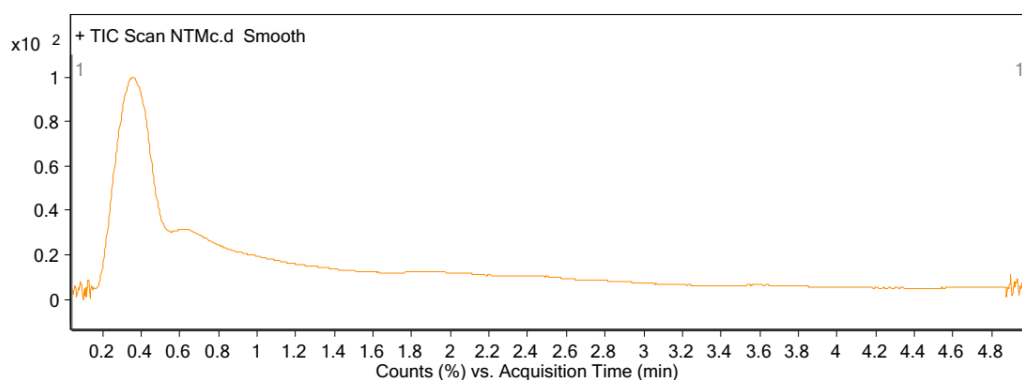

## Qualitative Analysis Report

## User Spectra

Fragmentor Voltage 140 Collision Energy 0 Ionization Mode ESI

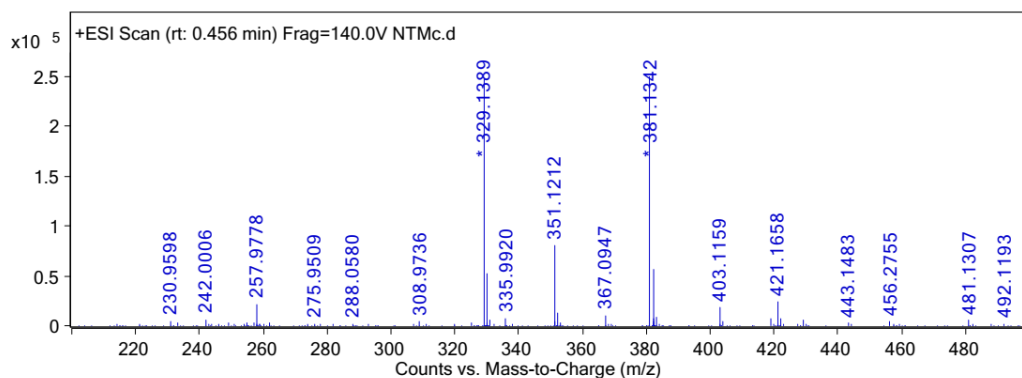

Sample Name  
User Name  
Sample Type  
ACQ Method

NTMc

Sample

Cot ngan - MSMS\_Pos.m

Position

Inj Vol

IRM Calibration Status

Comment

P1-A3

2

Success

Instrument Name

InjPosition

Data Filename

Acquired Time

Instrument 1

NTMc.d

01/07/2021 3:12:06 PM

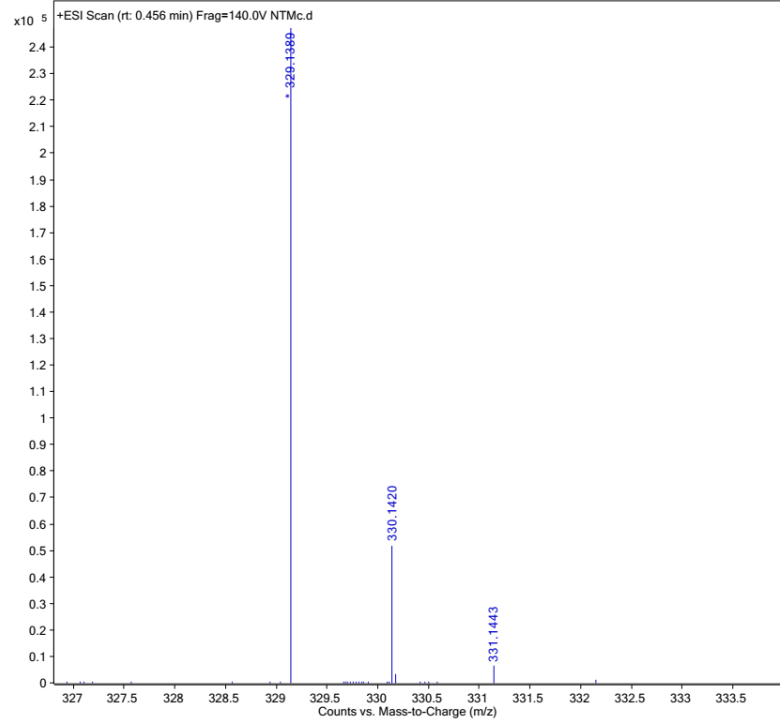

# $^1\text{H}$ -NMR

NTM-DMSO-1H

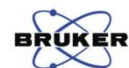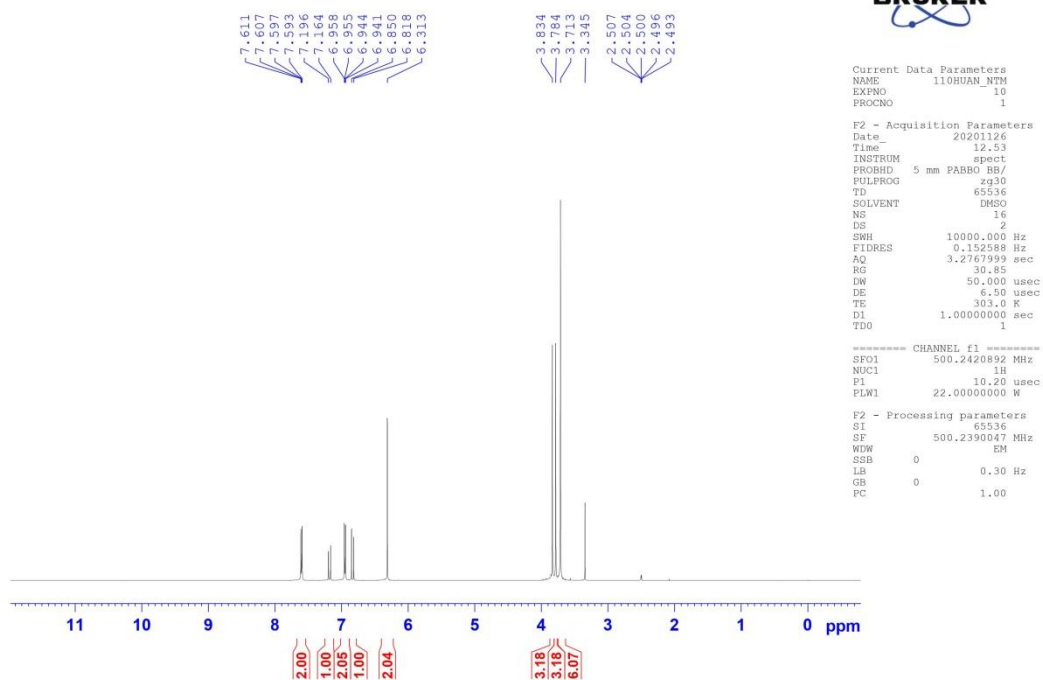

NTM-DMSO-1H

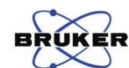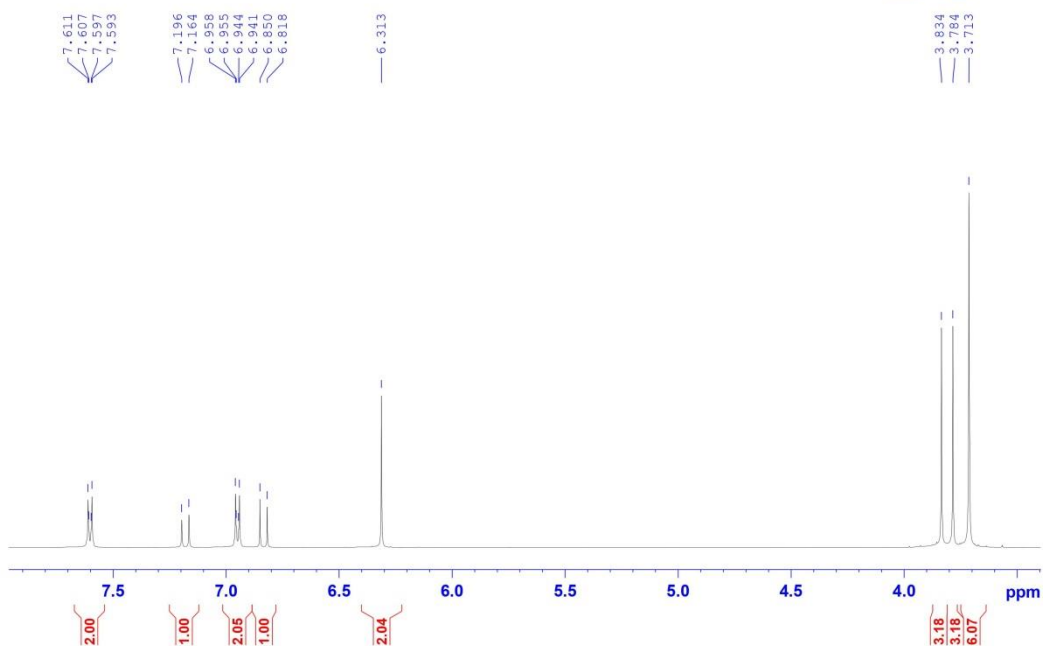

# $^{13}\text{C}$ -NMR

NTM-DMSO-C13CPD

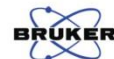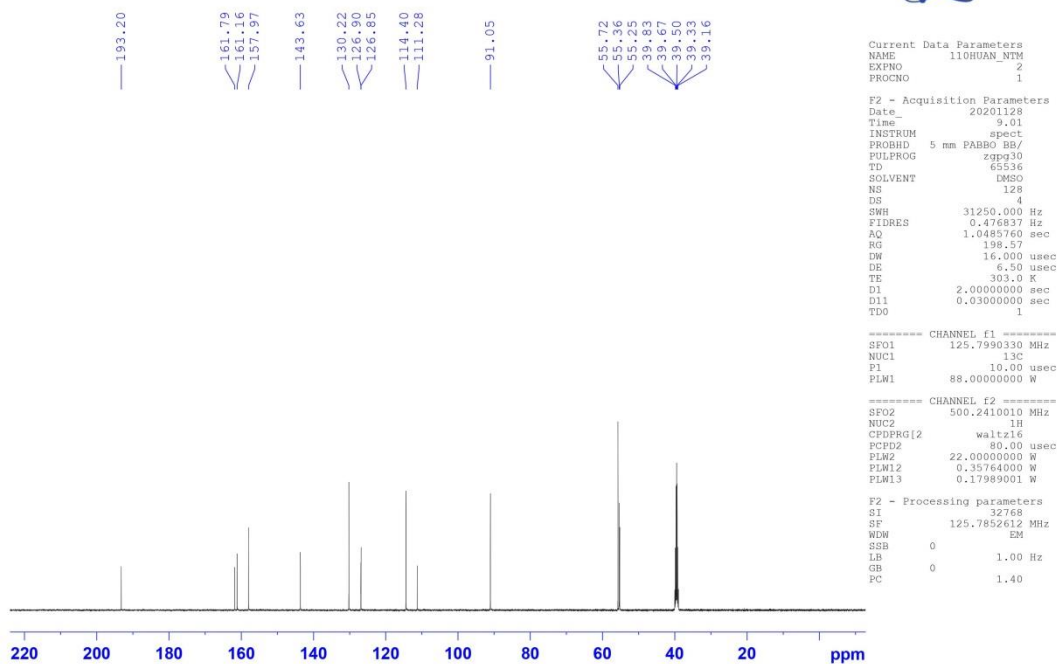

NTM-DMSO-C13CPD

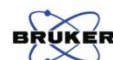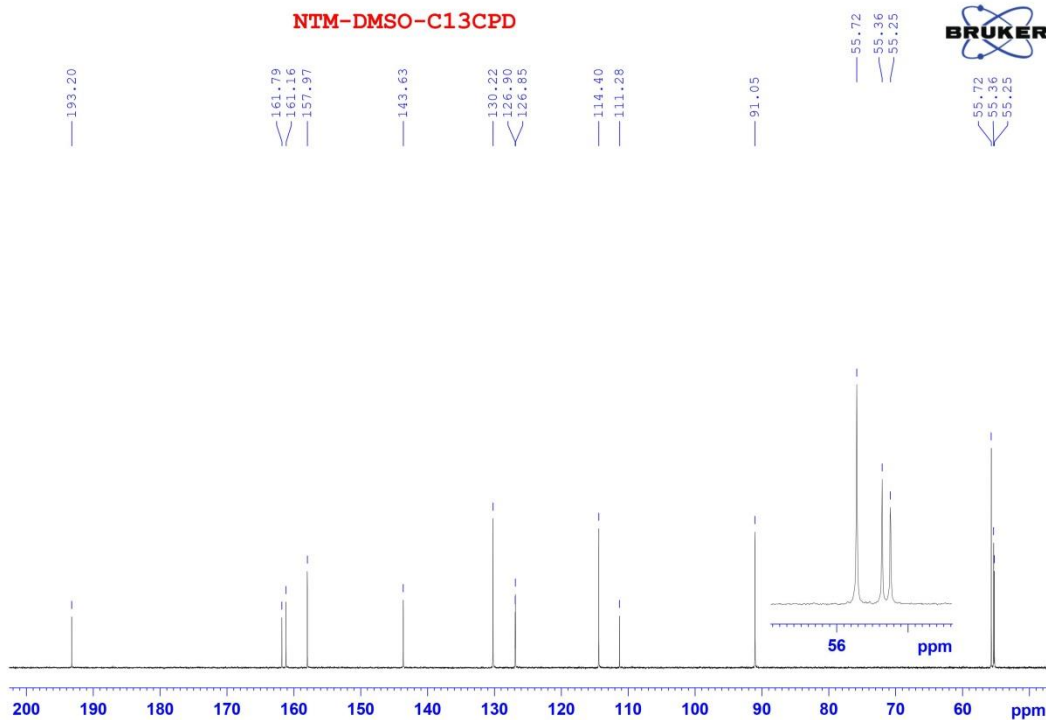

Supplement: f1 [file 4817900.f1.zip]
