# Supplementary material for: Synthesis and Evaluation of the Acetylcholinesterase Inhibitory Activities of Some Flavonoids Derived from Naringenin
Source: Hindawi journal article supplement (doi:10.1155/2021/4817900), 2021-11-30

**Table S1. Spectral data of compound 1**

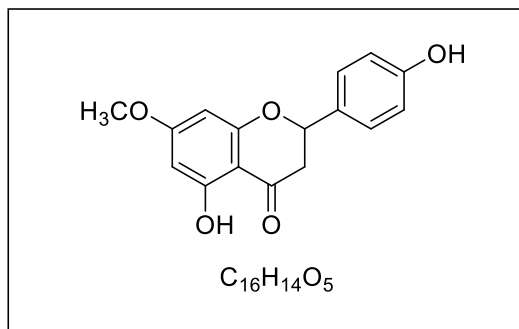

## UV

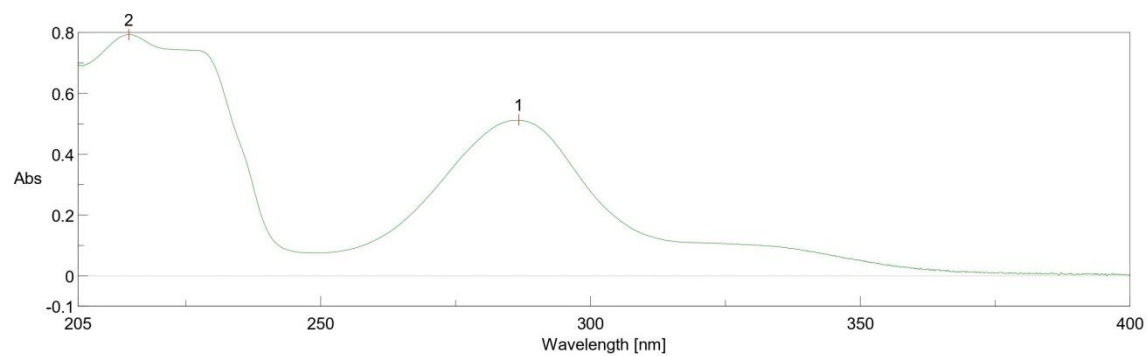

[ Result of Peak Picking ]

| No. | Position | Intensity | No. | Position | Intensity | No. | Position | Intensity |
|-----|----------|-----------|-----|----------|-----------|-----|----------|-----------|
| 1   | 286.7    | 0.512171  | 2   | 214.4    | 0.793113  |     |          |           |

## IR

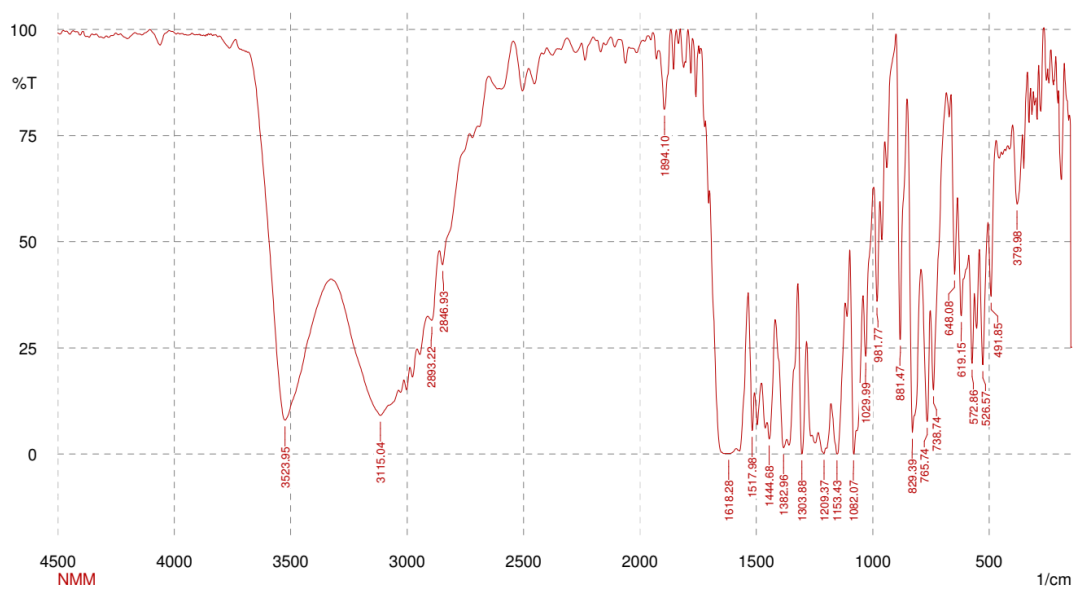

# HR-MS

## Qualitative Analysis Report

|                        |                       |                        |                                                       |
|------------------------|-----------------------|------------------------|-------------------------------------------------------|
| Data File              | NMM.d                 | Sample Name            | NMM                                                   |
| Sample Type            | Sample                | Position               | P1-A1                                                 |
| Instrument Name        | Instrument 1          | User Name              |                                                       |
| Acq Method             | Cot ngan - MSMS_Pos.m | Acquired Time          | 01/07/2021 3:01:03 PM                                 |
| IRM Calibration Status | Success               | DA Method              | COTNGAN.M.m                                           |
| Comment                |                       |                        |                                                       |
| Sample Group           |                       | Info.                  |                                                       |
| Stream Name            | LC 1                  | Acquisition SW Version | 6200 series TOF/6500 series Q-TOF B.06.01 (B6172 SP1) |

## User Chromatograms

Fragmentor Voltage 140 Collision Energy 0 Ionization Mode ESI

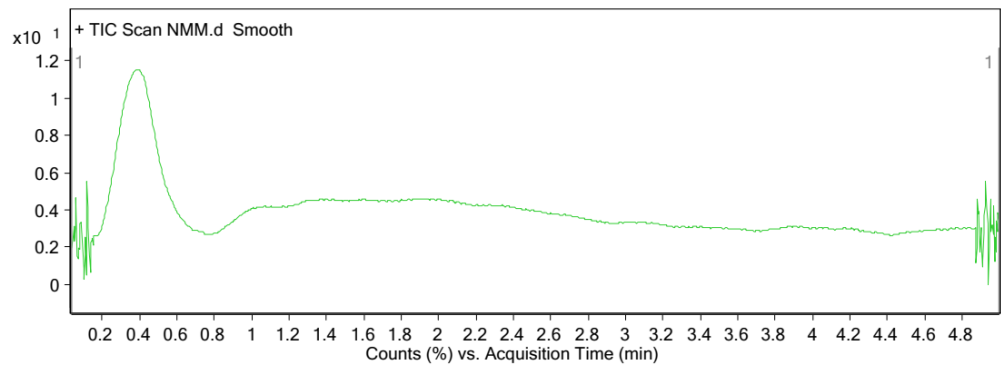

## Qualitative Analysis Report

## User Spectra

Fragmentor Voltage 140 Collision Energy 0 Ionization Mode ESI

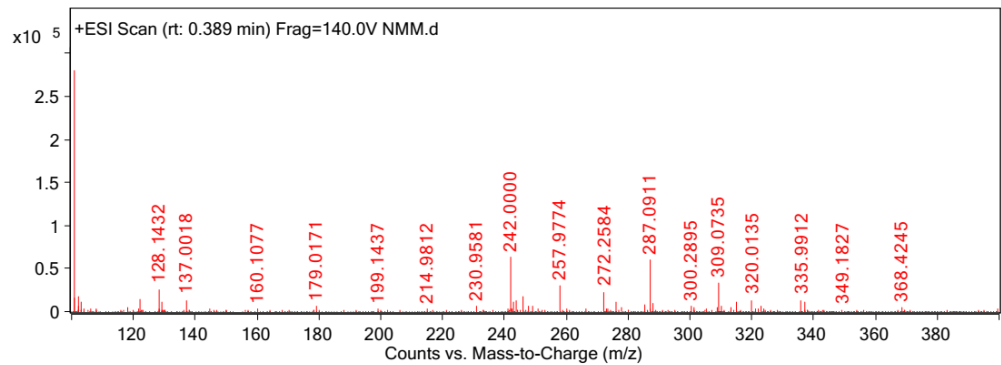

|             |                       |                        |         |                 |                       |
|-------------|-----------------------|------------------------|---------|-----------------|-----------------------|
| Sample Name | NMM                   | Position               | P1-A1   | Instrument Name | Instrument 1          |
| User Name   |                       | Inj Vol                | 2       | InjPosition     |                       |
| Sample Type | Sample                | IRM Calibration Status | Success | Data Filename   | NMM.d                 |
| ACQ Method  | Cot ngan - MSMS_Pos.m | Comment                |         | Acquired Time   | 01/07/2021 3:01:03 PM |

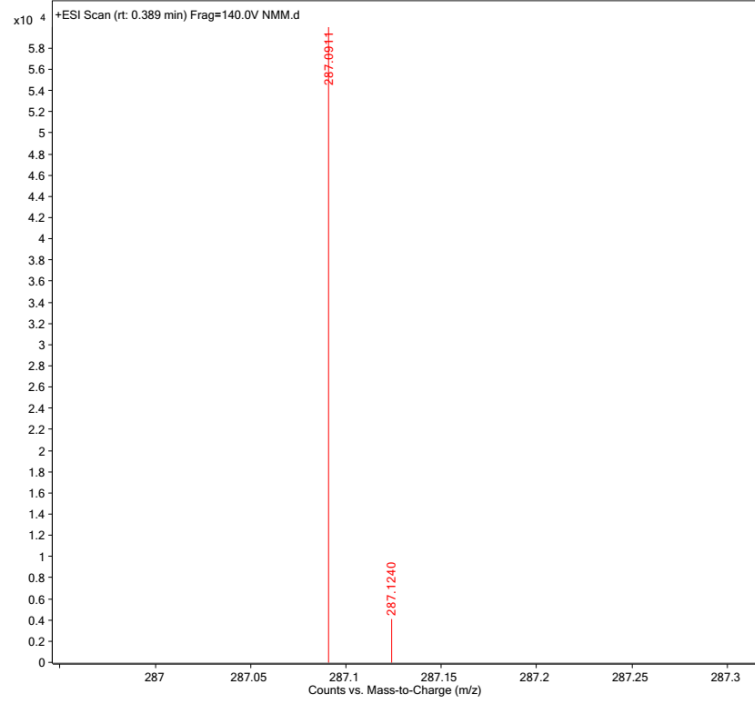

# $^1\text{H}$ -NMR

NMM-DMSO-1H

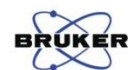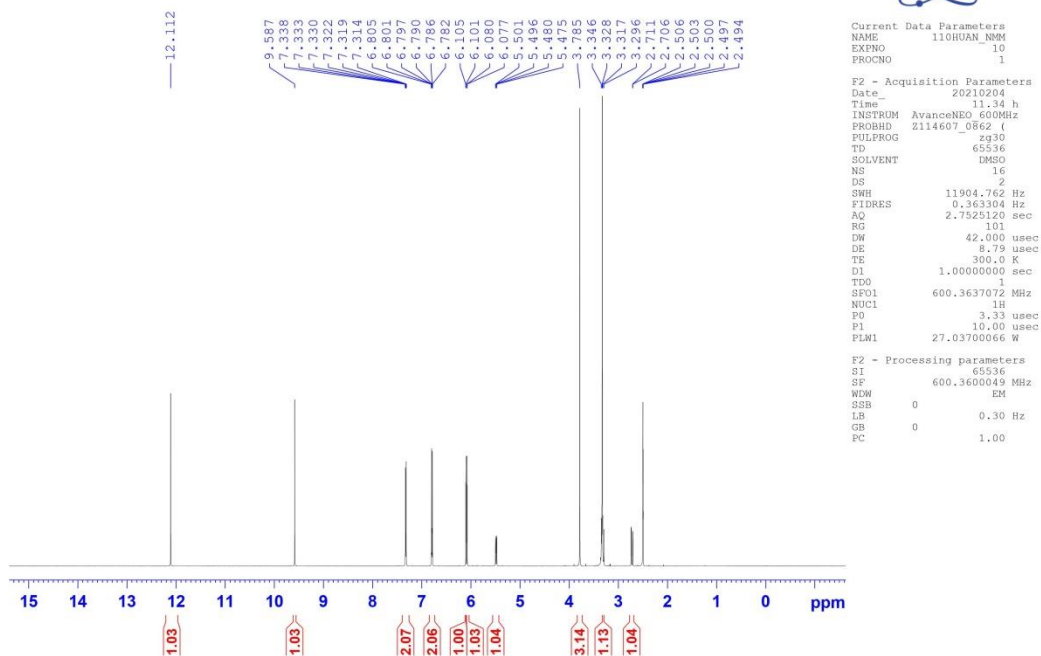

NMM-DMSO-1H

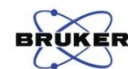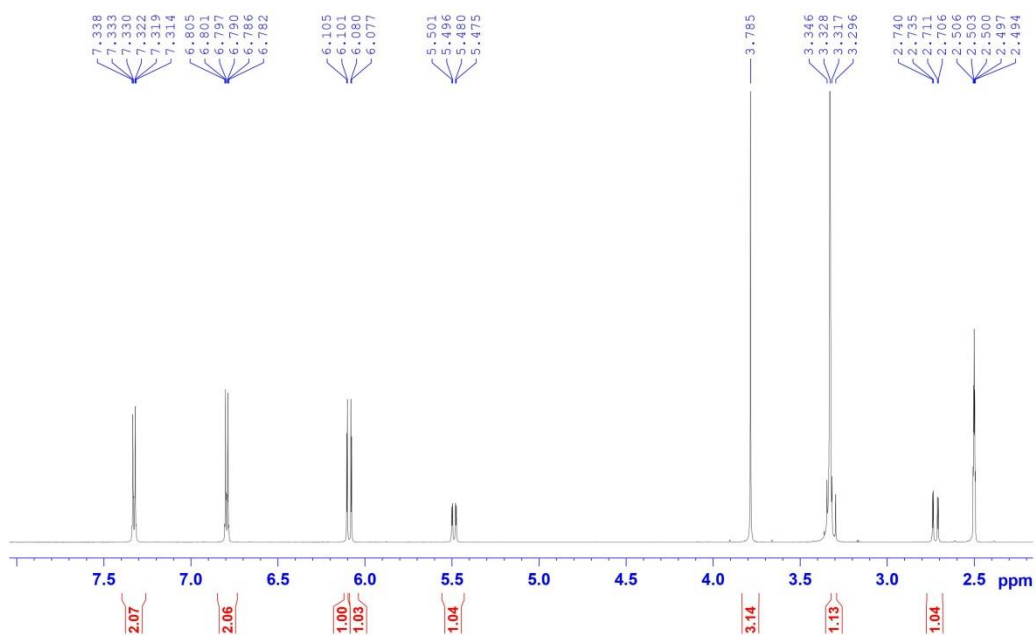

# $^{13}\text{C}$ -NMR

NMM-DMSO-C13CPD

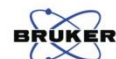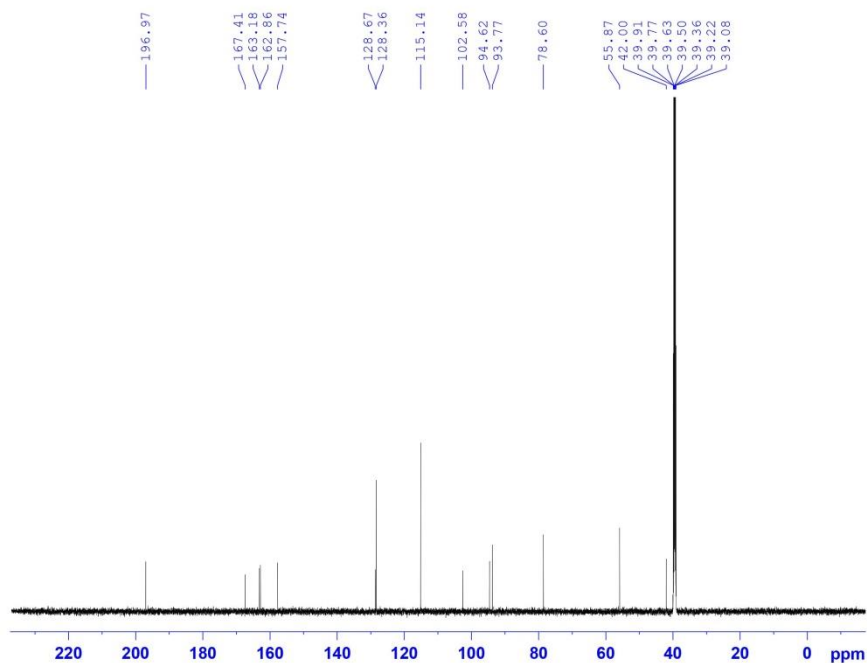

Current Data Parameters  
NAME 110HUN\_NMM  
EXPNO 2  
PROCNO 1

F2 - Acquisition Parameters  
Date 20210207  
Time 18.23 h  
INSTRUM AvanceNEO 600MHz  
PROBHD Z114607 0862 ( zpgpg30  
PULPROG zpgpg30  
TD 65536  
SOLVENT DMSO  
NS 512  
DS 4  
SWH 38461.539 Hz  
FIDRES 1.173753 Hz  
AQ 0.8519680 sec  
RG 101  
DW 13.000 usec  
DE 6.50 usec  
TE 300.0 K  
D1 2.00000000 sec  
D11 0.03000000 sec  
TDO 1  
SFO1 150.9772477 MHz  
NUC1  $^{13}\text{C}$   
P0 4.00 usec  
P1 12.00 usec  
PLW1 86.32800293 W  
SFO2 600.3624014 MHz  
NUC2  $^1\text{H}$   
CPDPRG2 waltz65  
PCPD2 70.00 usec  
PLW2 27.03700066 W  
PLW12 0.55177999 W  
PLW13 0.27754000 W

F2 - Processing parameters  
SI 32768  
SF 150.9607162 MHz  
WDW EM  
SSB 0  
LB 1.00 Hz  
GB 0  
PC 1.40

NMM-DMSO-C13CPD

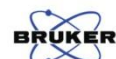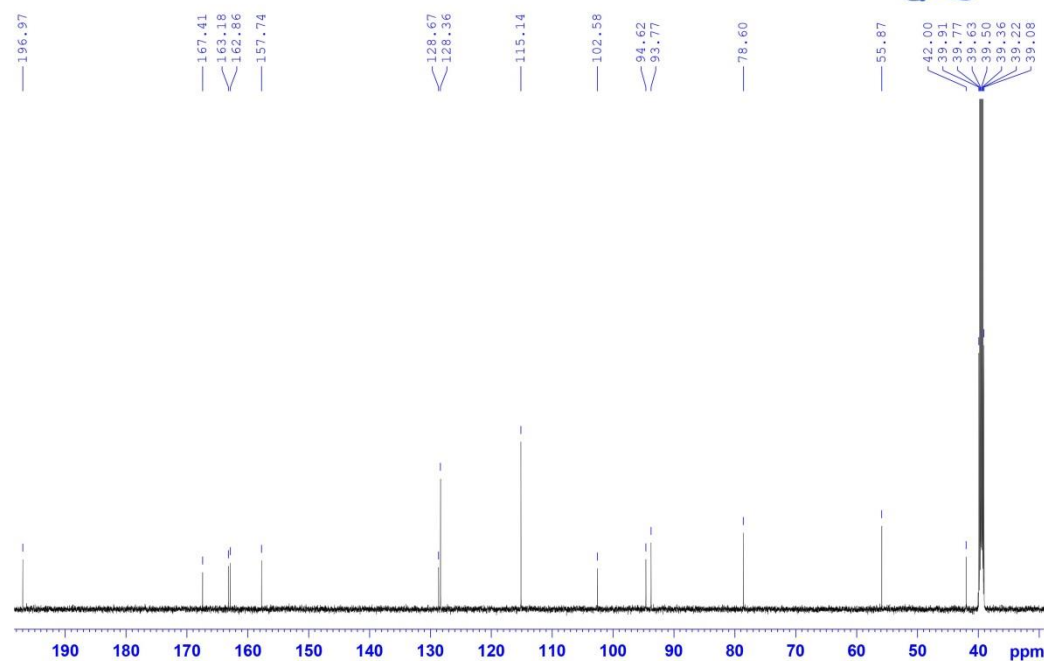

Supplement: f1 [file 4817900.f1.zip]
