# Supplementary material for: Synthesis and Evaluation of the Acetylcholinesterase Inhibitory Activities of Some Flavonoids Derived from Naringenin
Source: Hindawi journal article supplement (doi:10.1155/2021/4817900), 2021-11-30

**Table S9. Spectral data of compound 9**

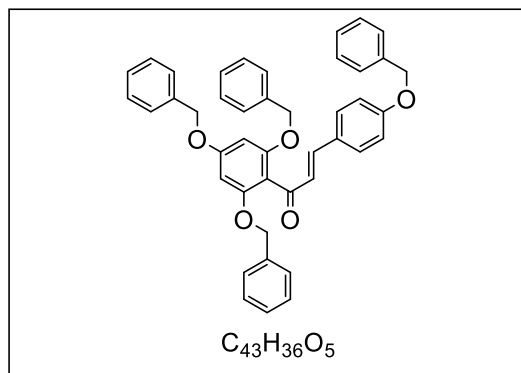

## UV

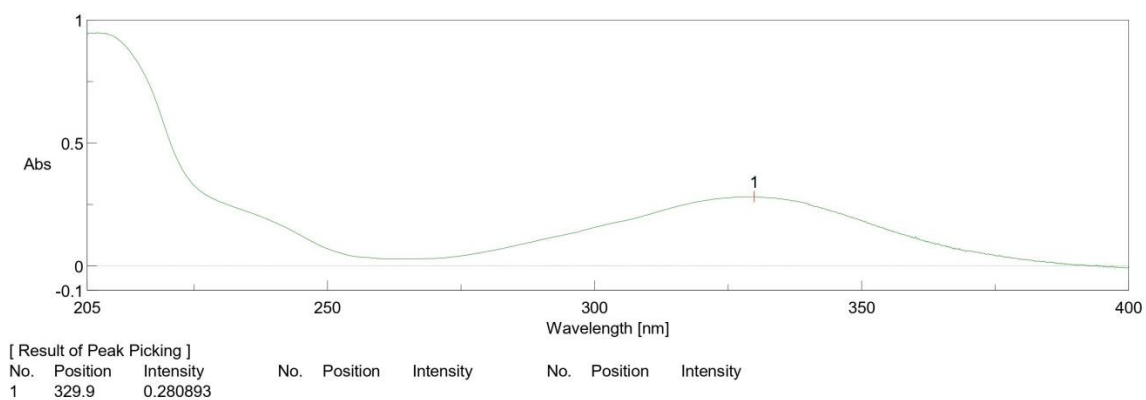

## IR

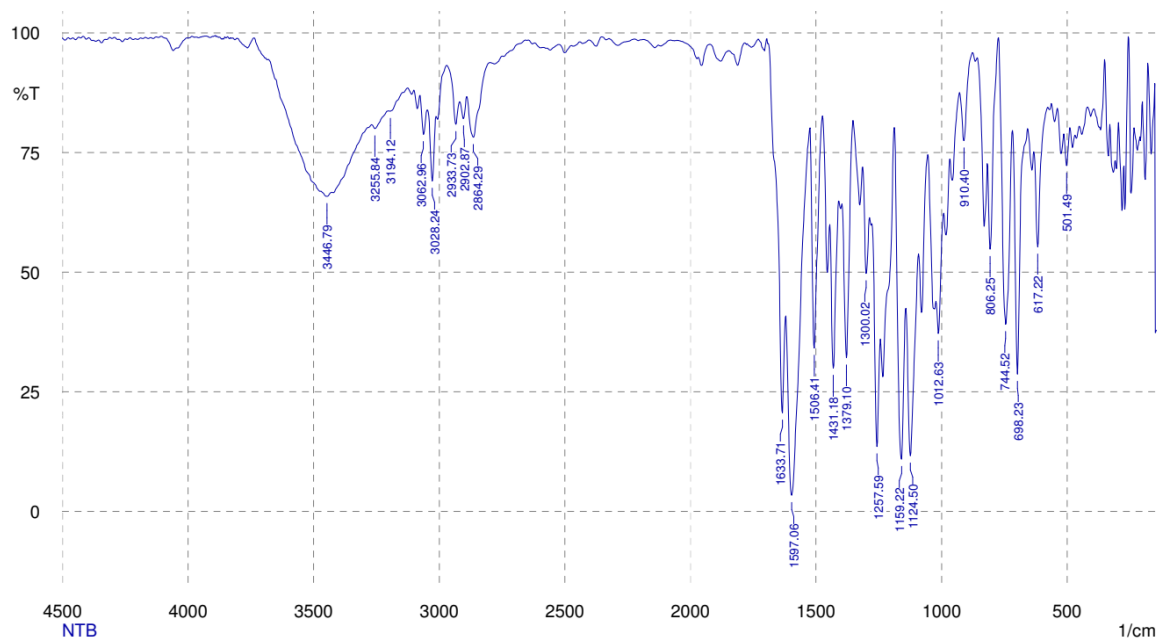

# HR-MS

## Qualitative Analysis Report

|                        |                       |                        |                                                       |
|------------------------|-----------------------|------------------------|-------------------------------------------------------|
| Data File              | NTBc.d                | Sample Name            | NTBc                                                  |
| Sample Type            | Sample                | Position               | P1-A9                                                 |
| Instrument Name        | Instrument 1          | User Name              |                                                       |
| Acq Method             | Cot ngan - MSMS_Pos.m | Acquired Time          | 01/07/2021 3:45:27 PM                                 |
| IRM Calibration Status | Success               | DA Method              | COTNGAN.M.m                                           |
| Comment                |                       |                        |                                                       |
| Sample Group           |                       | Info.                  |                                                       |
| Stream Name            | LC 1                  | Acquisition SW Version | 6200 series TOF/6500 series Q-TOF B.06.01 (B6172 SP1) |

## User Chromatograms

Fragmentor Voltage 140 Collision Energy 0 Ionization Mode ESI

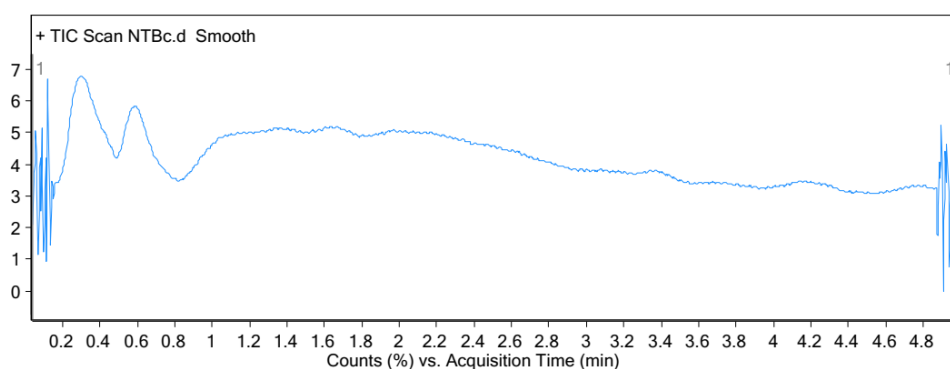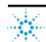

Agilent Technologies

Page 1 of 4

Printed at 12:29 AM on 2-Jul-2021

## Qualitative Analysis Report

## User Spectra

Fragmentor Voltage 140 Collision Energy 0 Ionization Mode ESI

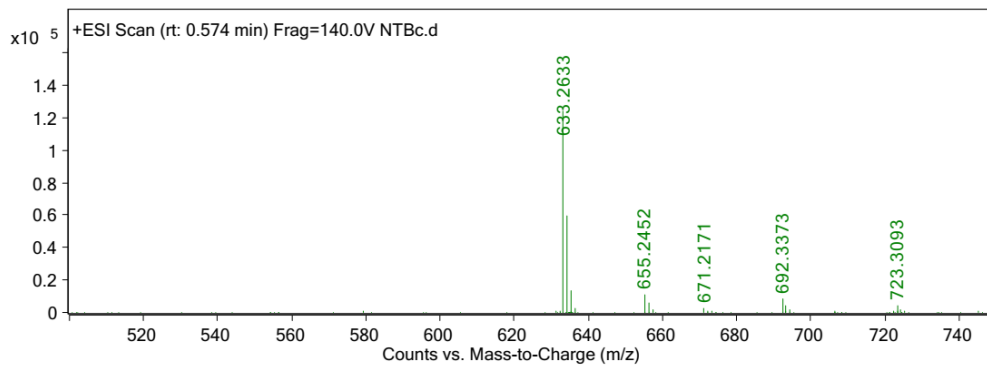

|             |                       |                        |         |                 |                       |
|-------------|-----------------------|------------------------|---------|-----------------|-----------------------|
| Sample Name | NTBc                  | Position               | P1-A9   | Instrument Name | Instrument 1          |
| User Name   |                       | Inj Vol                | 2       | InjPosition     |                       |
| Sample Type | Sample                | IRM Calibration Status | Success | Data Filename   | NTBc.d                |
| ACQ Method  | Cot ngan - MSMS_Pos.m | Comment                |         | Acquired Time   | 01/07/2021 3:45:27 PM |

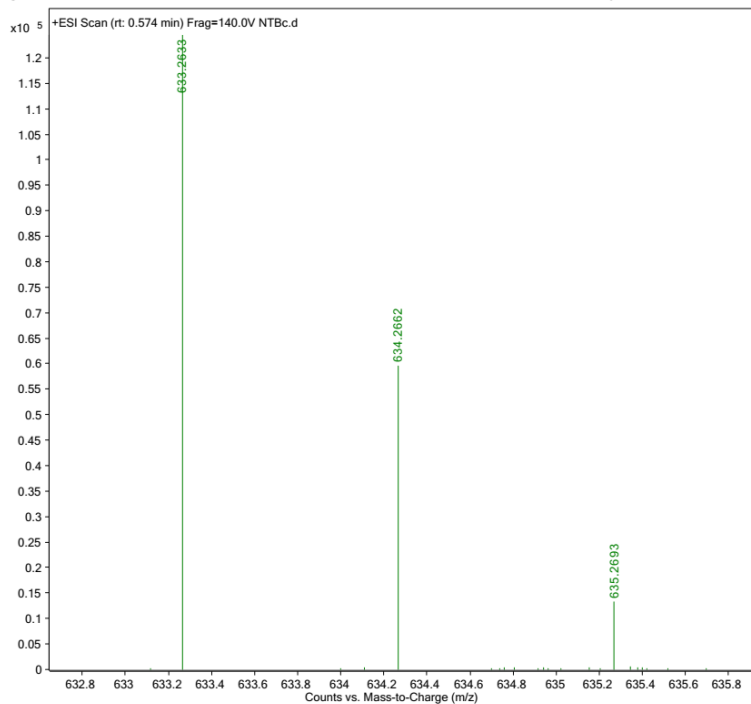

# <sup>1</sup>H-NMR

NTB-DMSO-1H

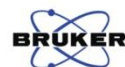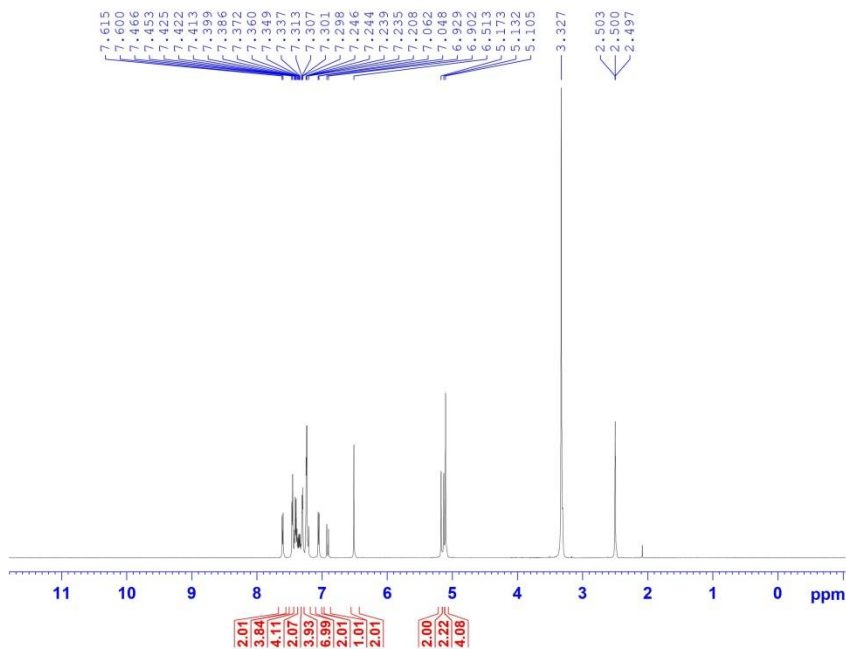

Current Data Parameters  
NAME 110HUAN\_NTB  
EXPNO 10  
PROCNO 1

F2 - Acquisition Parameters  
Date\_ 20210204  
Time 11.29 h  
INSTRUM AvanceNEO 600MHz  
PROBHD Z114607\_0862 (1  
PULPROG zg30  
TD 65536  
SOLVENT DMSO  
NS 16  
DS 2  
SWH 11904.762 Hz  
FIDRES 0.363304 Hz  
AQ 2.7525120 sec  
RG 101  
DM 42.000 usec  
DE 8.79 usec  
TE 300.0 K  
D1 1.00000000 sec  
TDO 1  
SFO1 600.3637072 MHz  
NUC1 1H  
FO 3.33 usec  
P1 10.00 usec  
PLM1 27.03700066 W

F2 - Processing parameters  
SI 65536  
SF 600.3600048 MHz  
WDW EM  
SSB 0  
LB 0.30 Hz  
GB 0  
PC 1.00

NTB-DMSO-1H

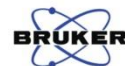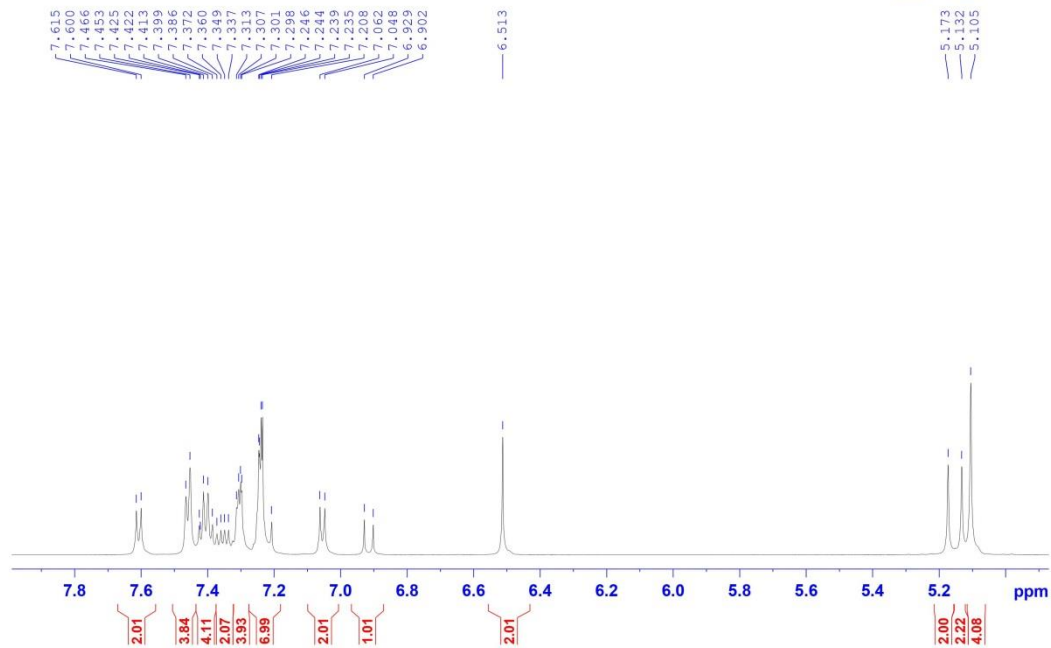

# $^{13}\text{C}$ -NMR

NTB-DMSO-C13CPD

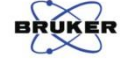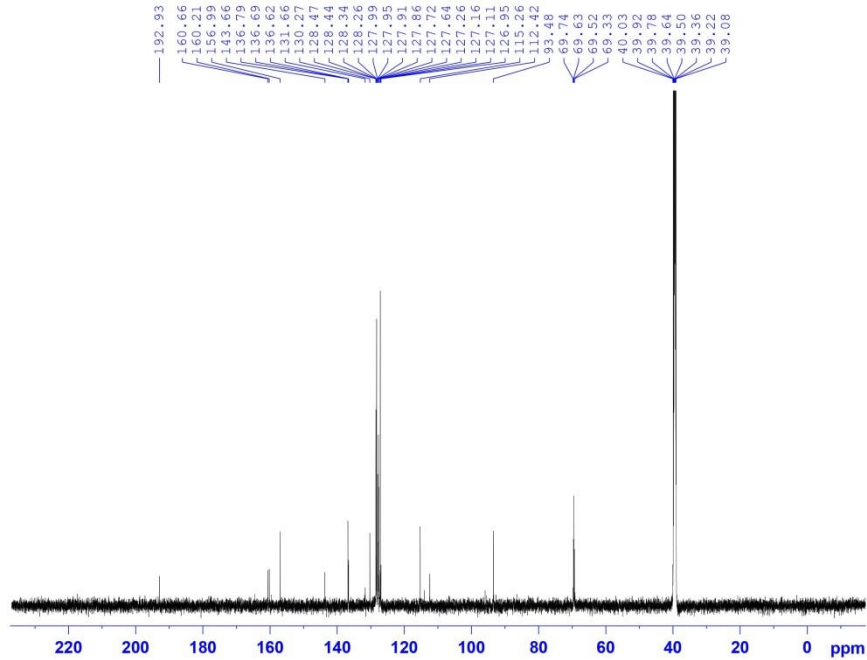

NTB-DMSO-C13CPD

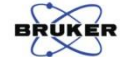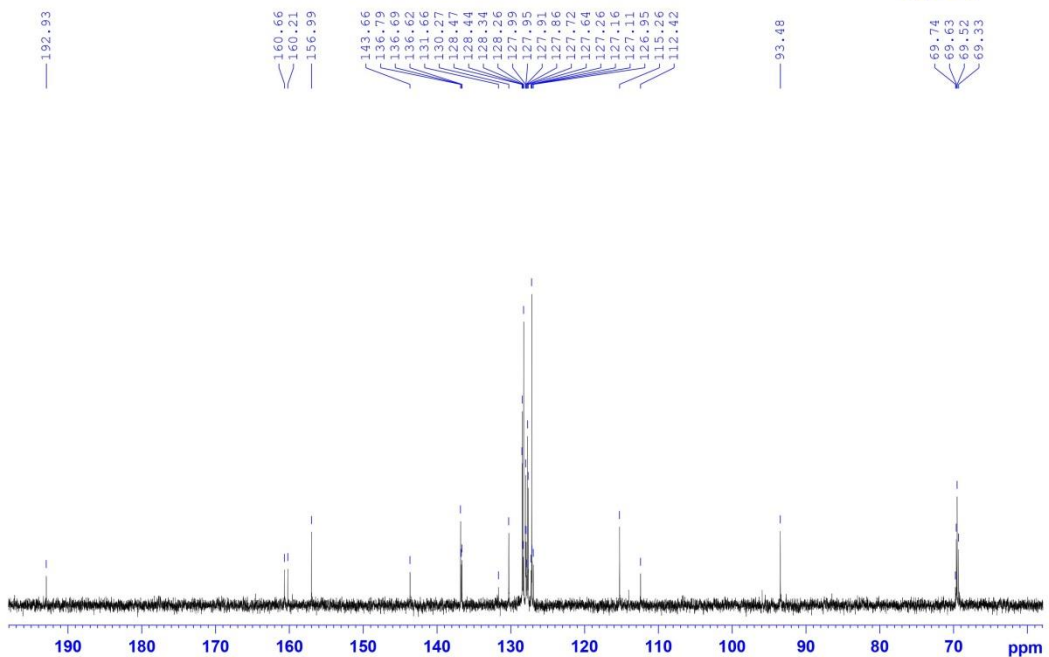

Supplement: f1 [file 4817900.f1.zip]
