# Supplementary material for: Synthesis and Evaluation of the Acetylcholinesterase Inhibitory Activities of Some Flavonoids Derived from Naringenin
Source: Hindawi journal article supplement (doi:10.1155/2021/4817900), 2021-11-30

**Table S2. Spectral data of compound 2**

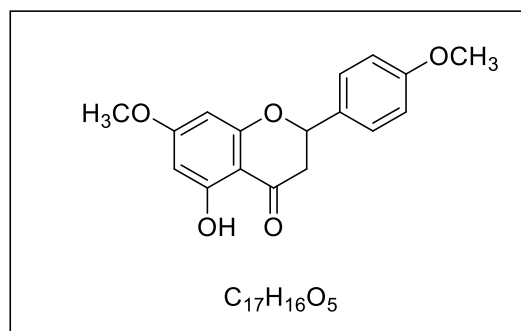

## UV

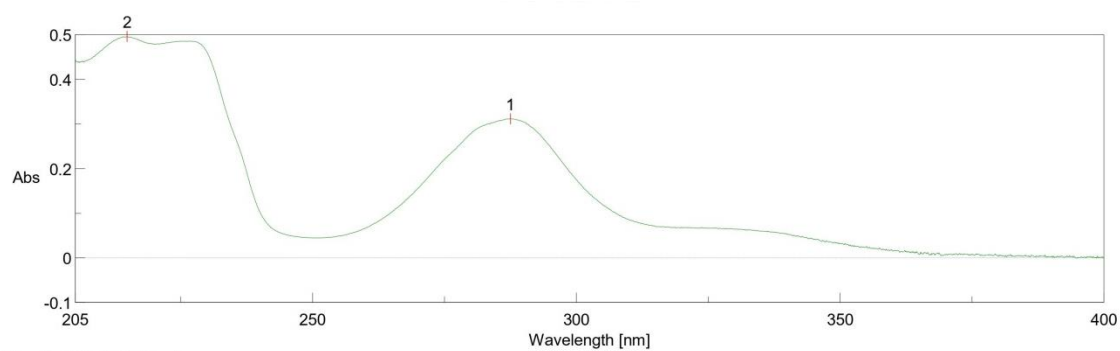

[ Result of Peak Picking ]

| No. | Position | Intensity | No. | Position | Intensity | No. | Position | Intensity |
|-----|----------|-----------|-----|----------|-----------|-----|----------|-----------|
| 1   | 287.5    | 0.311437  | 2   | 214.8    | 0.496255  |     |          |           |

## IR

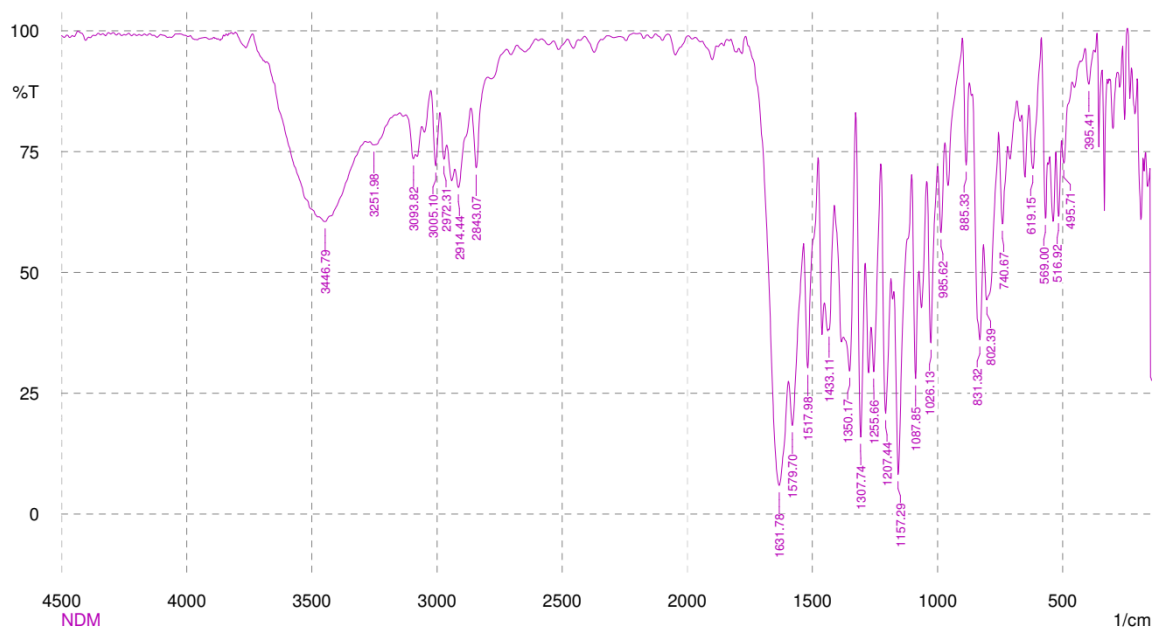

# HR-MS

## Qualitative Analysis Report

|                        |                       |                        |                                                       |
|------------------------|-----------------------|------------------------|-------------------------------------------------------|
| Data File              | NDM.d                 | Sample Name            | NDM                                                   |
| Sample Type            | Sample                | Position               | P1-A2                                                 |
| Instrument Name        | Instrument 1          | User Name              |                                                       |
| Acq Method             | Cot ngan - MSMS_Pos.m | Acquired Time          | 01/07/2021 3:06:33 PM                                 |
| IRM Calibration Status | Success               | DA Method              | COTNGAN.M.m                                           |
| Comment                |                       | Info.                  |                                                       |
| Sample Group           |                       | Acquisition SW Version | 6200 series TOF/6500 series Q-TOF 8.06.01 (86172 SP1) |
| Stream Name            | LC 1                  |                        |                                                       |

### User Chromatograms

Fragmentor Voltage 140 Collision Energy 0 Ionization Mode ESI

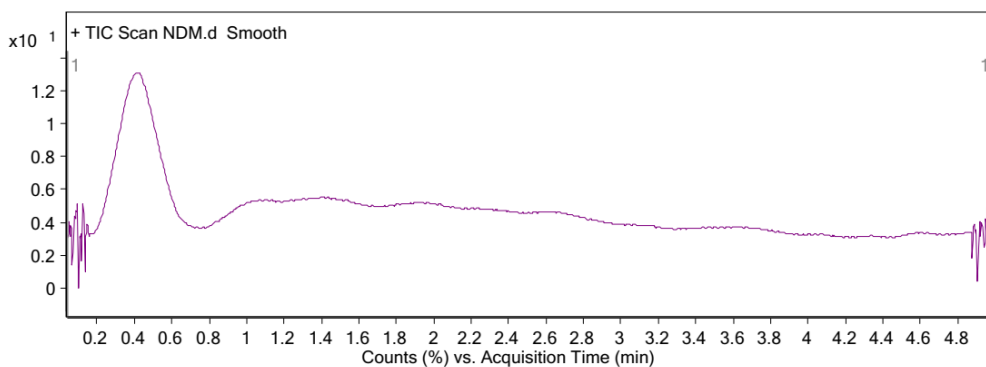

## Qualitative Analysis Report

### User Spectra

Fragmentor Voltage 140 Collision Energy 0 Ionization Mode ESI

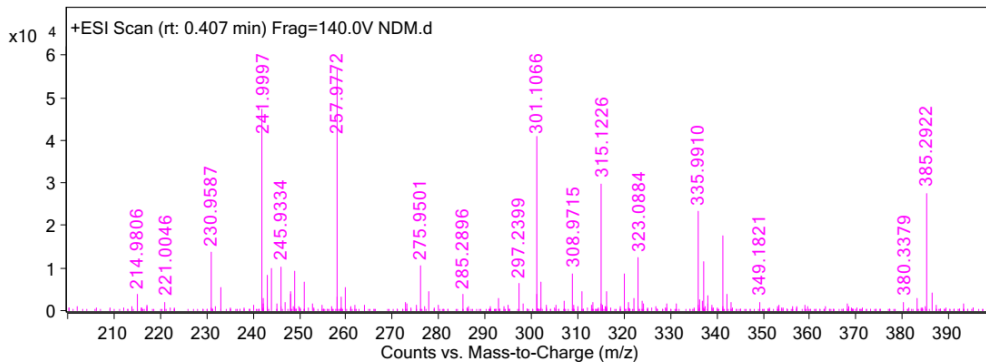

|             |                       |                        |         |                 |                       |
|-------------|-----------------------|------------------------|---------|-----------------|-----------------------|
| Sample Name | NDM                   | Position               | P1-A2   | Instrument Name | Instrument 1          |
| User Name   |                       | Inj Vol                | 2       | InjPosition     |                       |
| Sample Type | Sample                | IRM Calibration Status | Success | Data Filename   | NDM.d                 |
| ACQ Method  | Cot ngan - MSMS_Pos.m | Comment                |         | Acquired Time   | 01/07/2021 3:06:33 PM |

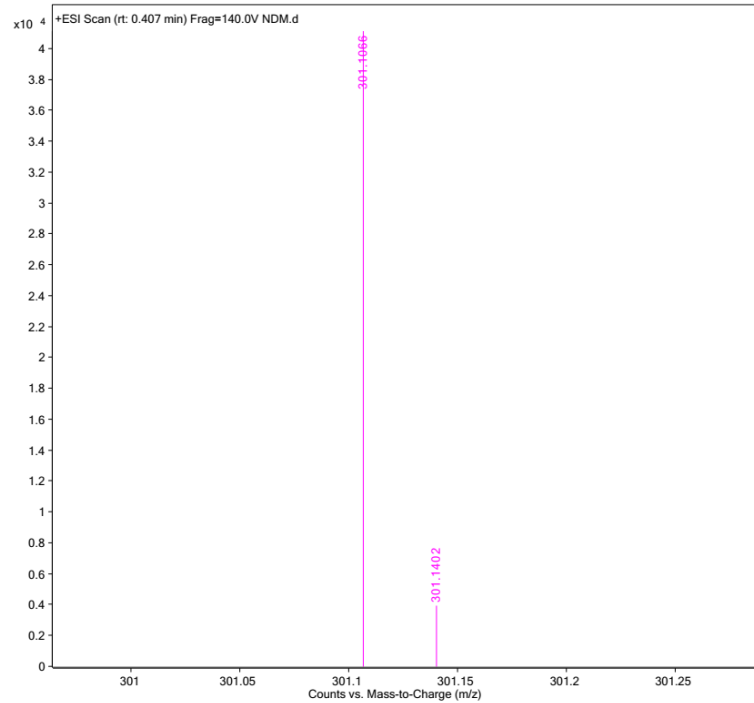

# $^1\text{H}$ -NMR

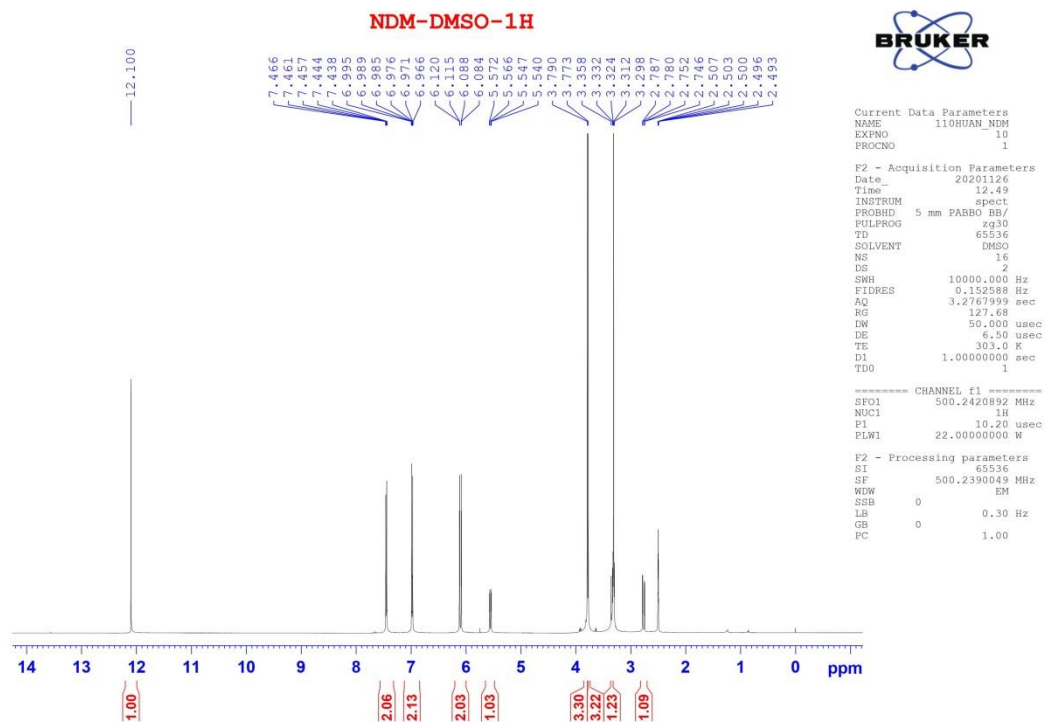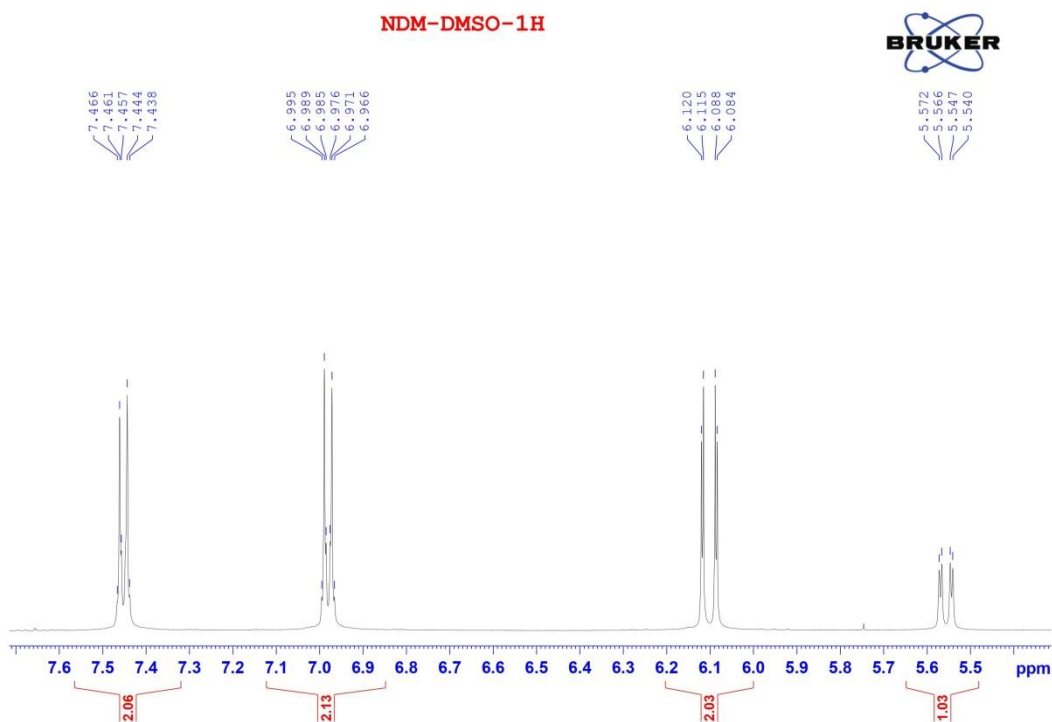

# $^{13}\text{C}$ -NMR

NDM-DMSO-C13CPD

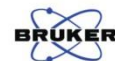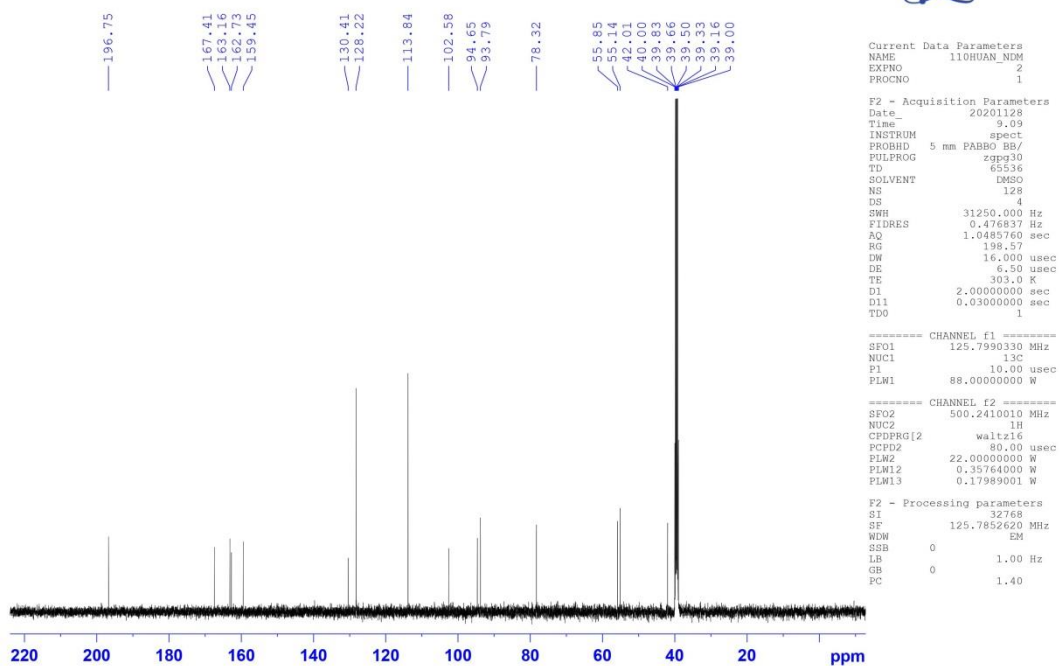

NDM-DMSO-C13CPD

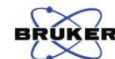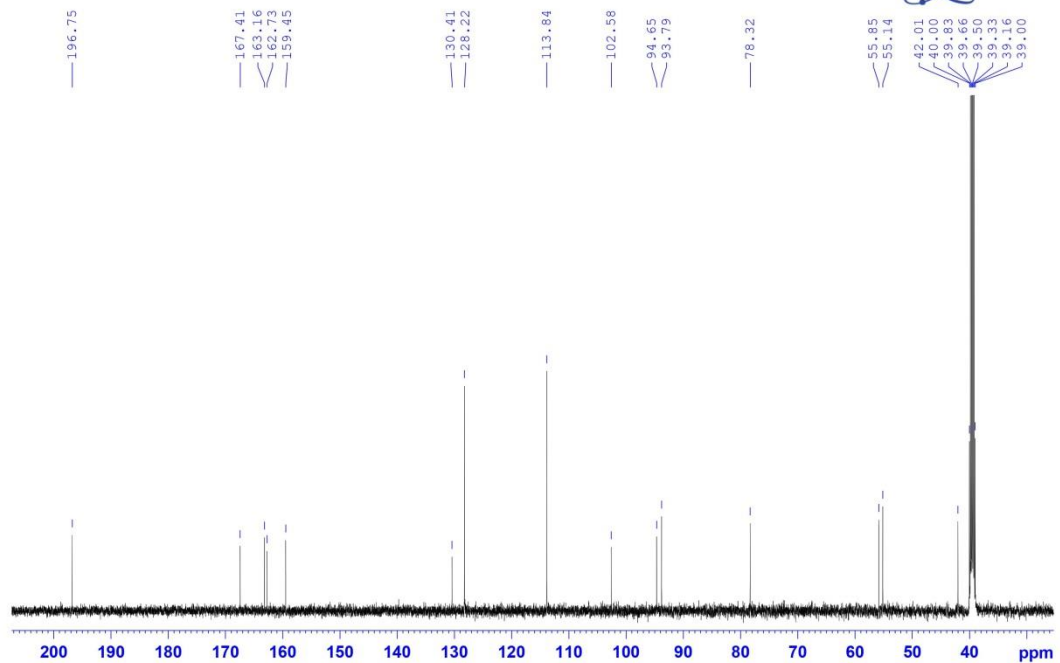

Supplement: f1 [file 4817900.f1.zip]
