# Supplementary material for: Synthesis and Evaluation of the Acetylcholinesterase Inhibitory Activities of Some Flavonoids Derived from Naringenin
Source: Hindawi journal article supplement (doi:10.1155/2021/4817900), 2021-11-30

**Table S8. Spectral data of compound 8**

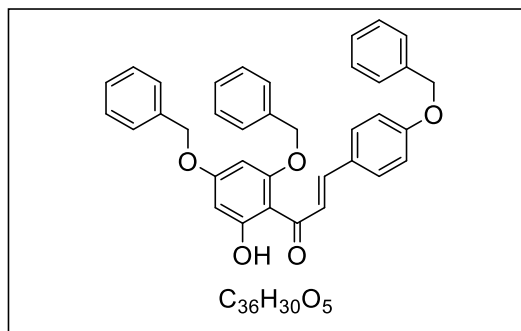

## UV

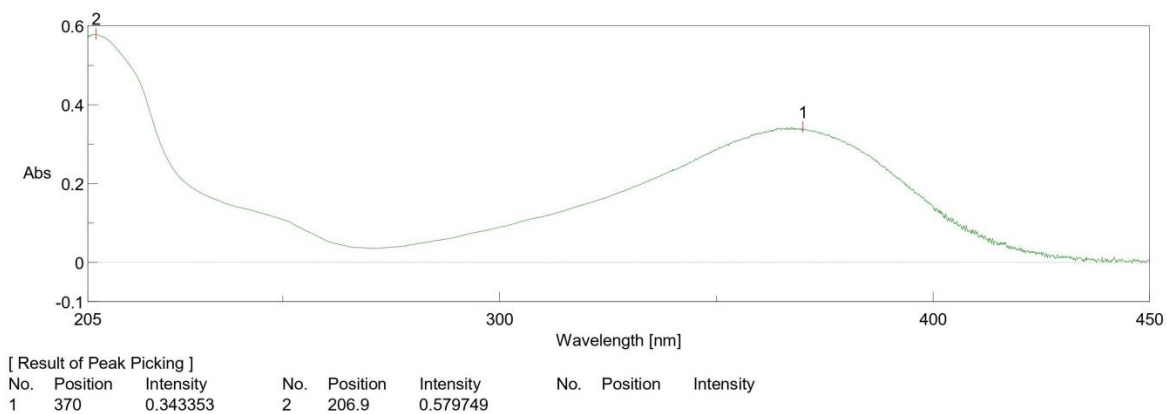

## IR

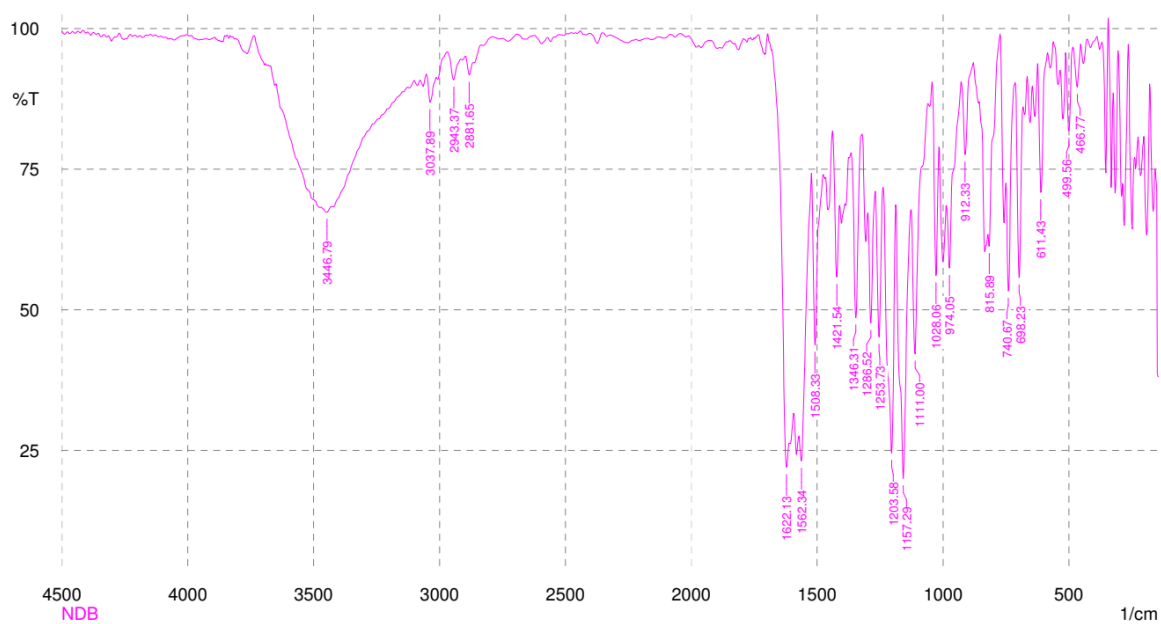

# HR-MS

## Qualitative Analysis Report

|                        |                       |                        |                                                       |
|------------------------|-----------------------|------------------------|-------------------------------------------------------|
| Data File              | NDBc.d                | Sample Name            | NDBc                                                  |
| Sample Type            | Sample                | Position               | P1-A8                                                 |
| Instrument Name        | Instrument 1          | User Name              |                                                       |
| Acq Method             | Cot ngan - MSMS_Pos.m | Acquired Time          | 01/07/2021 3:39:53 PM                                 |
| IRM Calibration Status | Success               | DA Method              | COTNGAN.M.m                                           |
| Comment                |                       | Info.                  |                                                       |
| Sample Group           |                       | Acquisition SW Version | 6200 series TOF/6500 series Q-TOF B.06.01 (B6172 SP1) |
| Stream Name            | LC 1                  |                        |                                                       |

## User Chromatograms

Fragmentor Voltage 140 Collision Energy 0 Ionization Mode ESI

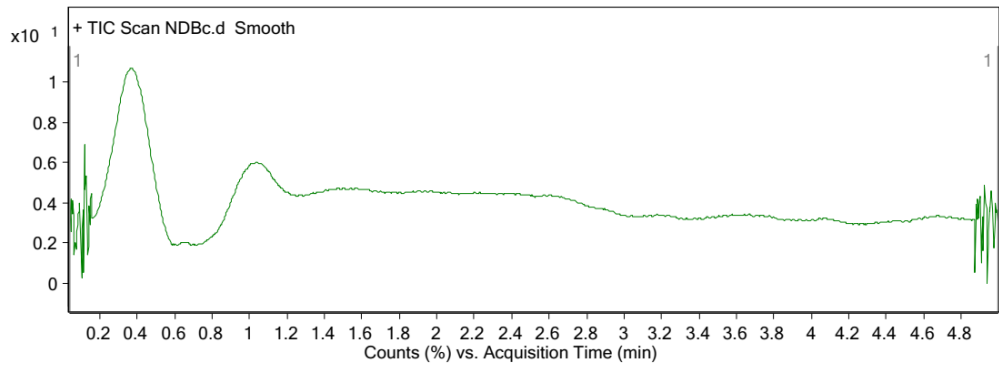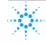

Agilent Technologies

Page 1 of 4

Printed at 12:12 AM on 2-Jul-2021

## Qualitative Analysis Report

## User Spectra

Fragmentor Voltage 140 Collision Energy 0 Ionization Mode ESI

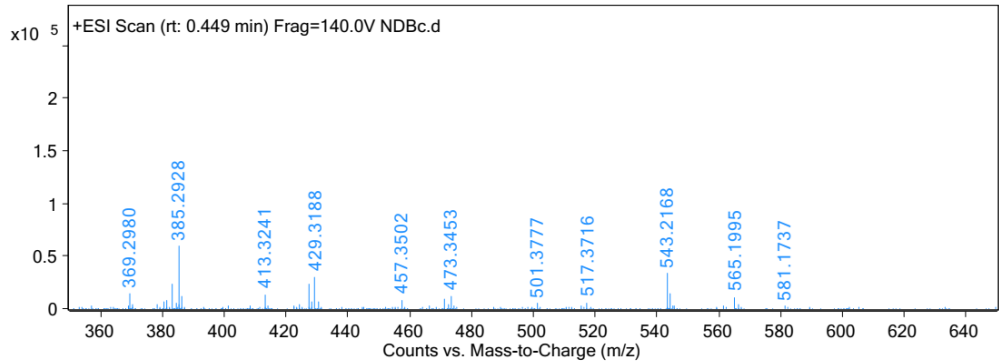

|             |                       |                        |         |                 |                       |
|-------------|-----------------------|------------------------|---------|-----------------|-----------------------|
| Sample Name | NDBc                  | Position               | P1-A8   | Instrument Name | Instrument 1          |
| User Name   |                       | Inj Vol                | 2       | InjPosition     |                       |
| Sample Type | Sample                | IRM Calibration Status | Success | Data Filename   | NDBc.d                |
| ACQ Method  | Cot ngan - MSMS_Pos.m | Comment                |         | Acquired Time   | 01/07/2021 3:39:53 PM |

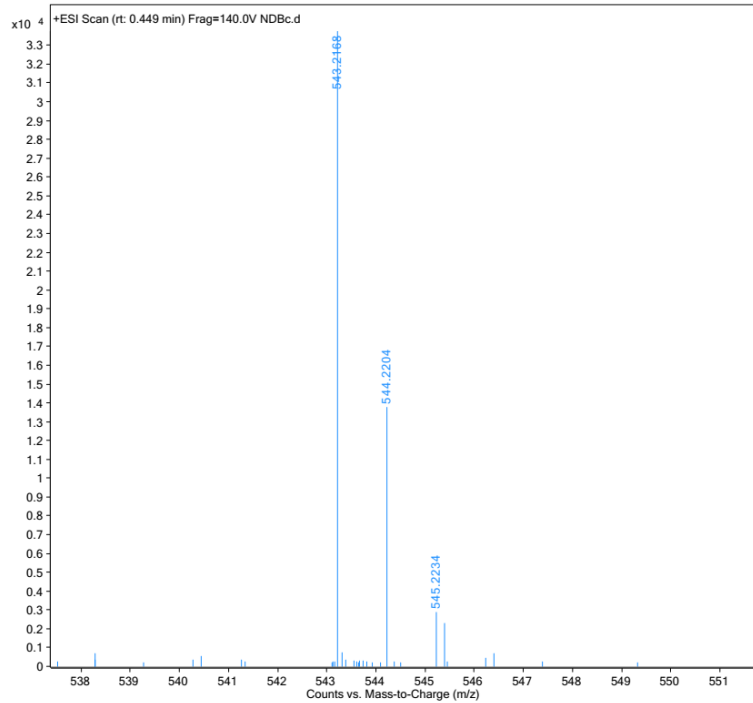

# $^1\text{H}$ -NMR

NDB-DMSO-1H

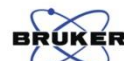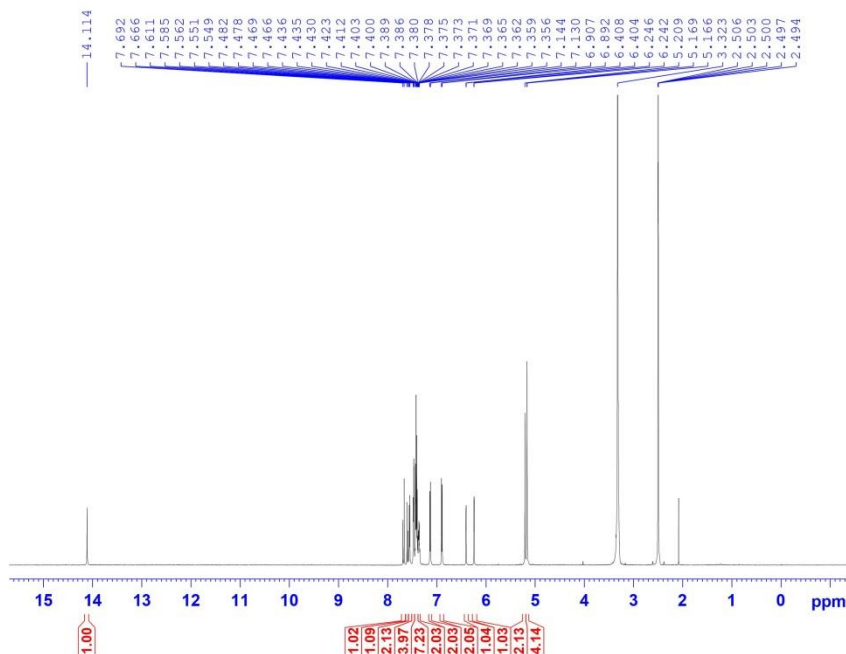

NDB-DMSO-1H

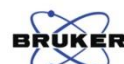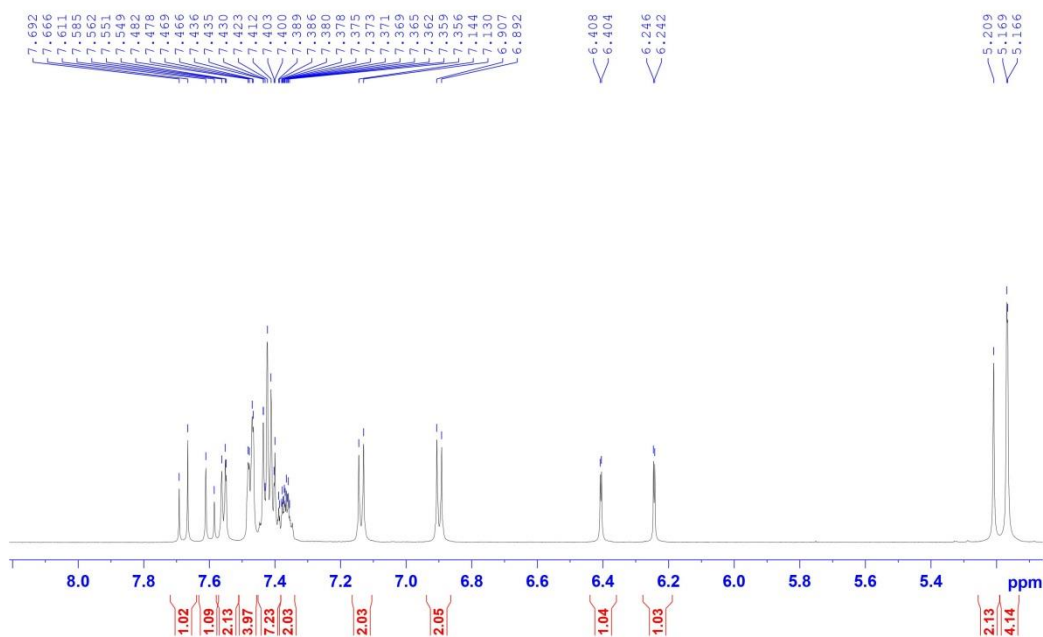

# $^{13}\text{C}$ -NMR

NDB-DMSO-C13CPD

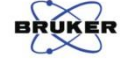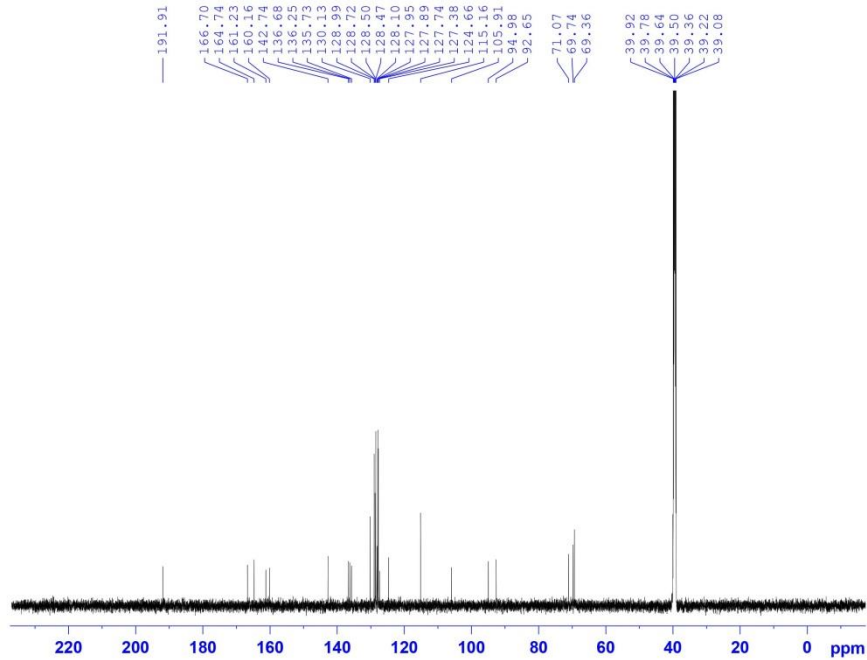

Current Data Parameters  
NAME 110HUA\_NDB  
EXPNO 2  
PROCNO 1

F2 - Acquisition Parameters  
Date\_ 20210208  
Time 1:27 h  
INSTRUM AvanceNeo 600MHz  
PROBHD Z114607.0862 (4  
PULPROG zgpg30  
TD 65536  
SOLVENT DMSO  
NS 4096  
DS 4  
SWH 38461.539 Hz  
FIDRES 1.173753 Hz  
AQ 0.8519680 sec  
RG 101  
DW 13.000 usec  
DE 6.50 usec  
TE 300.0 K  
D1 2.00000000 sec  
D11 0.03000000 sec  
TDO 1  
SFO1 150.9772477 MHz  
NUC1 13C  
P0 4.00 usec  
P1 12.00 usec  
PLM1 86.32800293 W  
SFO2 600.3624014 MHz  
NUC2 1H  
CPDPRG2 waltz65  
PCPD2 70.00 usec  
PLW2 27.03700066 W  
PLW12 0.55177999 W  
PLW13 0.27754000 W

F2 - Processing parameters  
SI 32768  
SF 150.9607175 MHz  
WDW EM  
SSB 0  
LB 1.00 Hz  
GB 0  
PC 1.40

NDB-DMSO-C13CPD

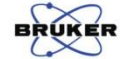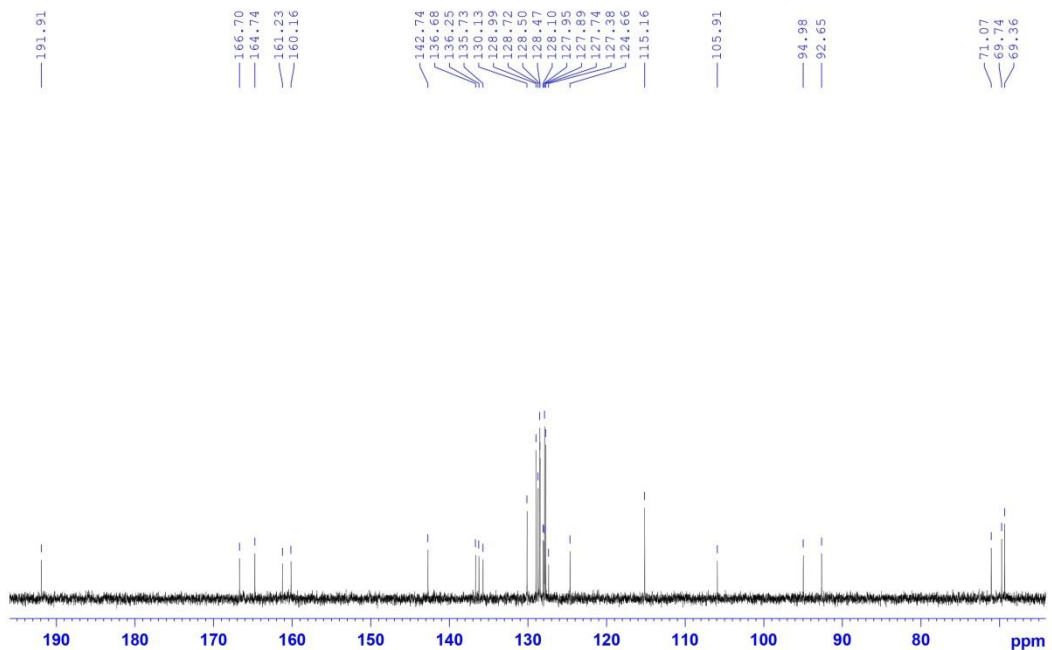

Supplement: f1 [file 4817900.f1.zip]
