# Supplementary material for: Synthesis and Evaluation of the Acetylcholinesterase Inhibitory Activities of Some Flavonoids Derived from Naringenin
Source: Hindawi journal article supplement (doi:10.1155/2021/4817900), 2021-11-30

**Table S6. Spectral data of compound 6**

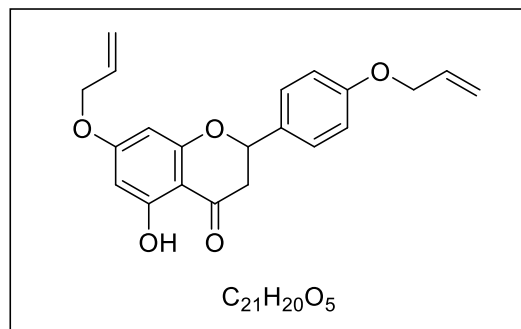

## UV

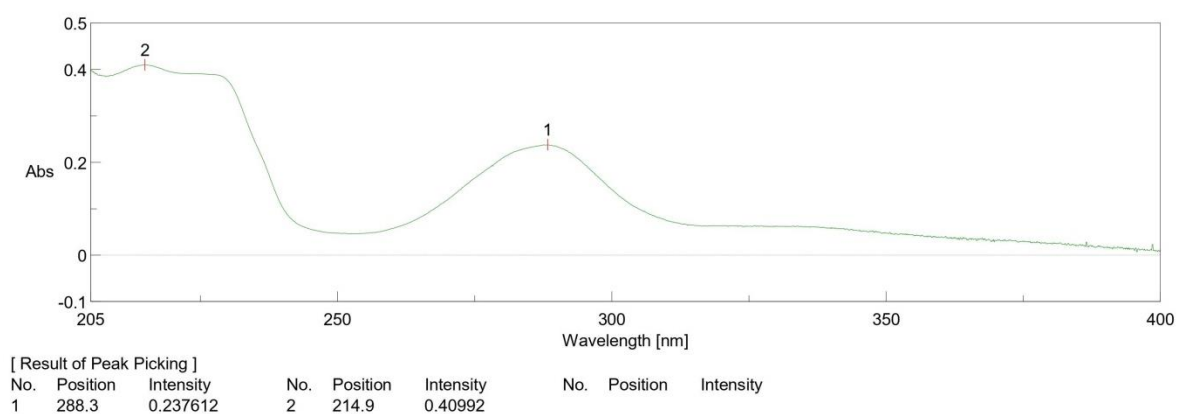

## IR

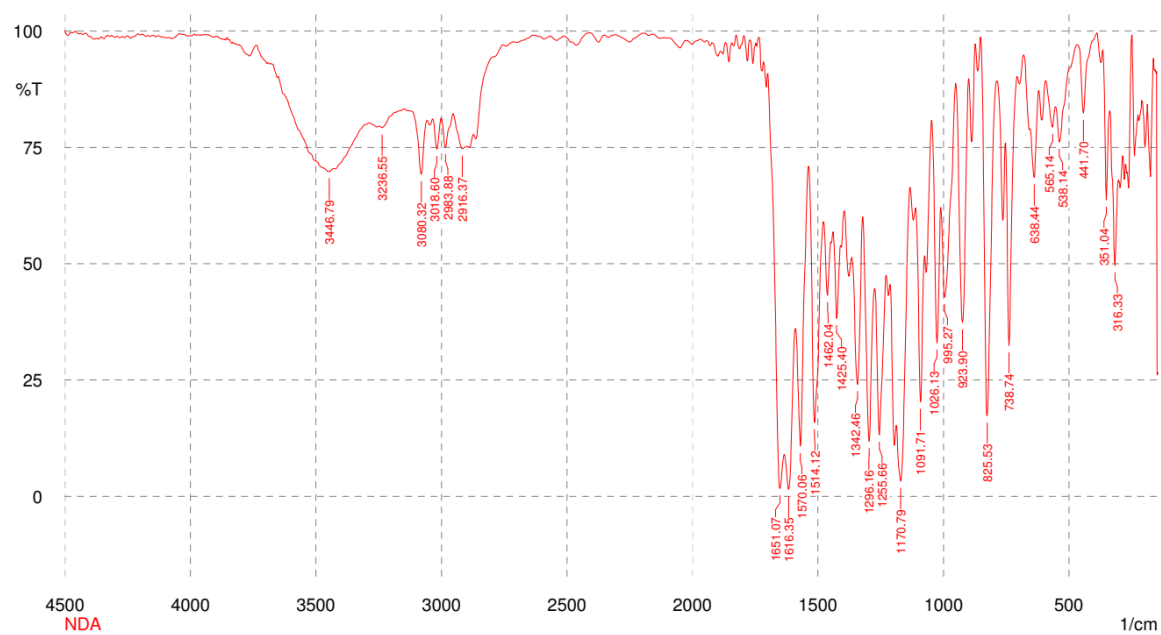

# HR-MS

## Qualitative Analysis Report

|                        |                       |                        |                                                       |
|------------------------|-----------------------|------------------------|-------------------------------------------------------|
| Data File              | NDA.d                 | Sample Name            | NDA                                                   |
| Sample Type            | Sample                | Position               | P1-A6                                                 |
| Instrument Name        | Instrument 1          | User Name              |                                                       |
| Acq Method             | Cot ngan - MSMS_Pos.m | Acquired Time          | 01/07/2021 3:28:46 PM                                 |
| IRM Calibration Status | Success               | DA Method              | COTNGAN.M.m                                           |
| Comment                |                       |                        |                                                       |
| Sample Group           |                       | Info.                  |                                                       |
| Stream Name            | LC 1                  | Acquisition SW Version | 6200 series TOF/6500 series Q-TOF B.06.01 (B6172 SP1) |

## User Chromatograms

Fragmentor Voltage 140 Collision Energy 0 Ionization Mode ESI

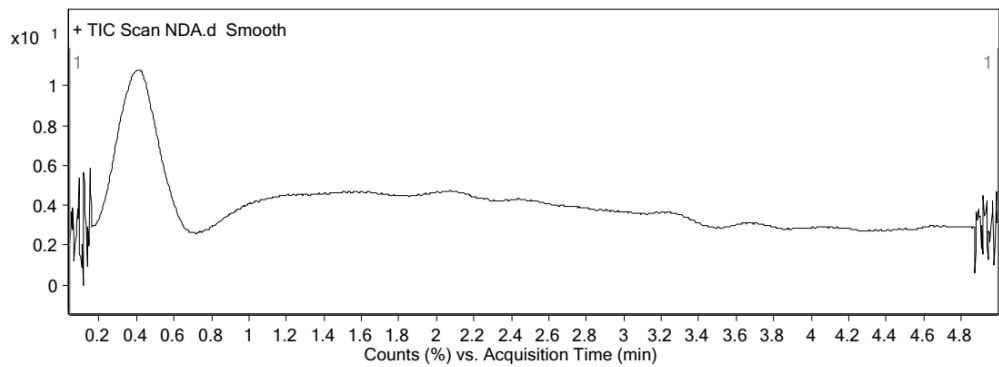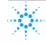

Agilent Technologies

Page 1 of 4

Printed at 12:02 AM on 2-Jul-2021

## Qualitative Analysis Report

## User Spectra

Fragmentor Voltage 140 Collision Energy 0 Ionization Mode ESI

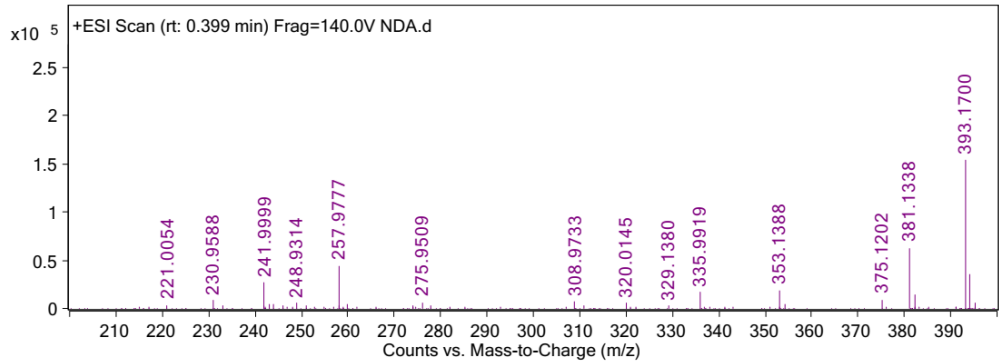

|             |                       |                        |         |                 |                       |
|-------------|-----------------------|------------------------|---------|-----------------|-----------------------|
| Sample Name | NDA                   | Position               | P1-A6   | Instrument Name | Instrument 1          |
| User Name   |                       | Inj Vol                | 2       | InjPosition     |                       |
| Sample Type | Sample                | IRM Calibration Status | Success | Data Filename   | NDA.d                 |
| ACQ Method  | Cot ngan - MSMS_Pos.m | Comment                |         | Acquired Time   | 01/07/2021 3:28:46 PM |

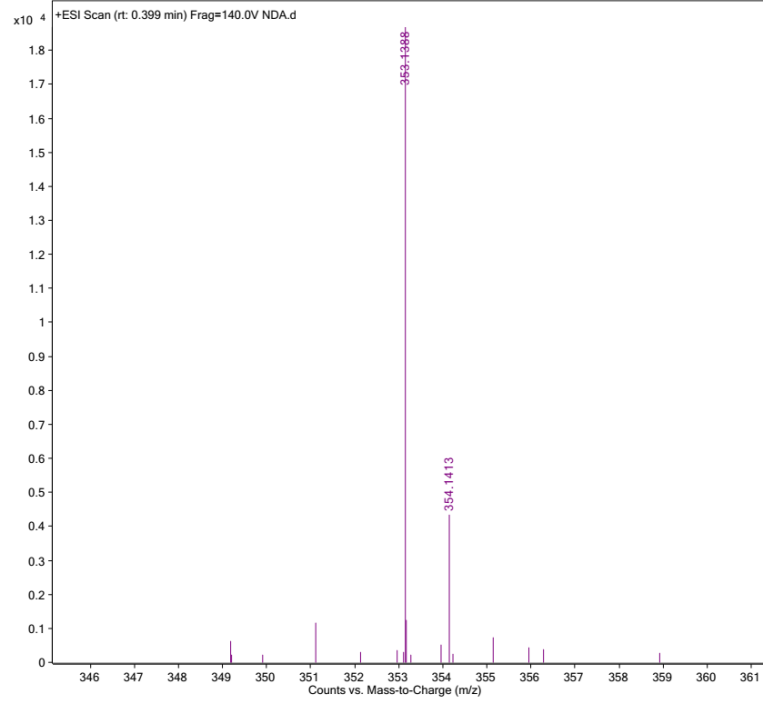

# $^1\text{H}$ -NMR

NDA-DMSO- $^1\text{H}$

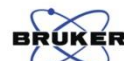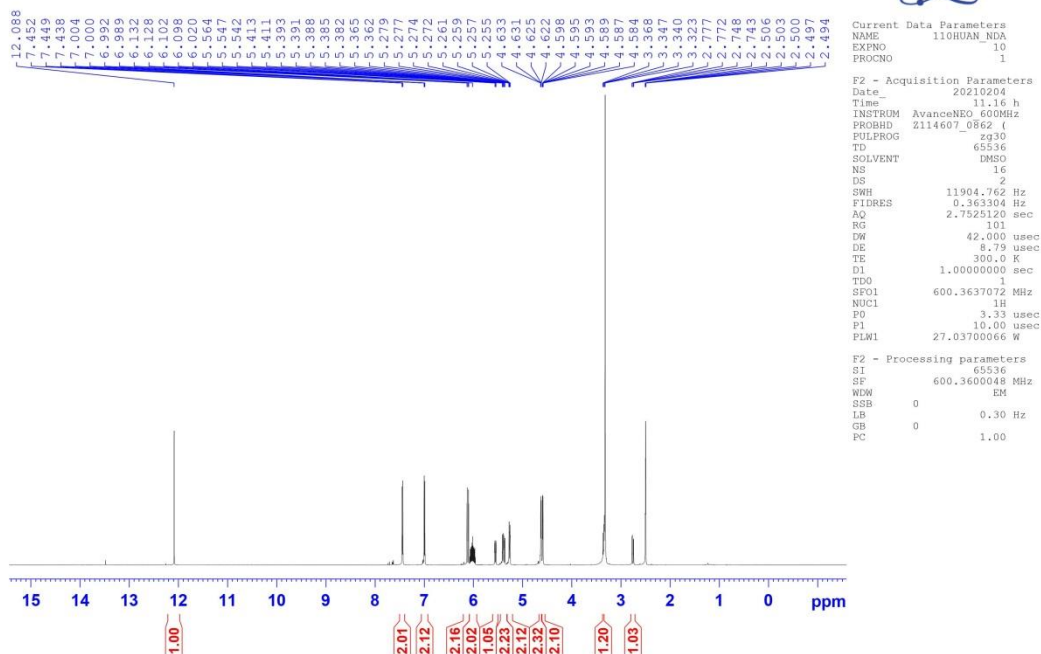

NDA-DMSO- $^1\text{H}$

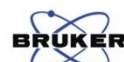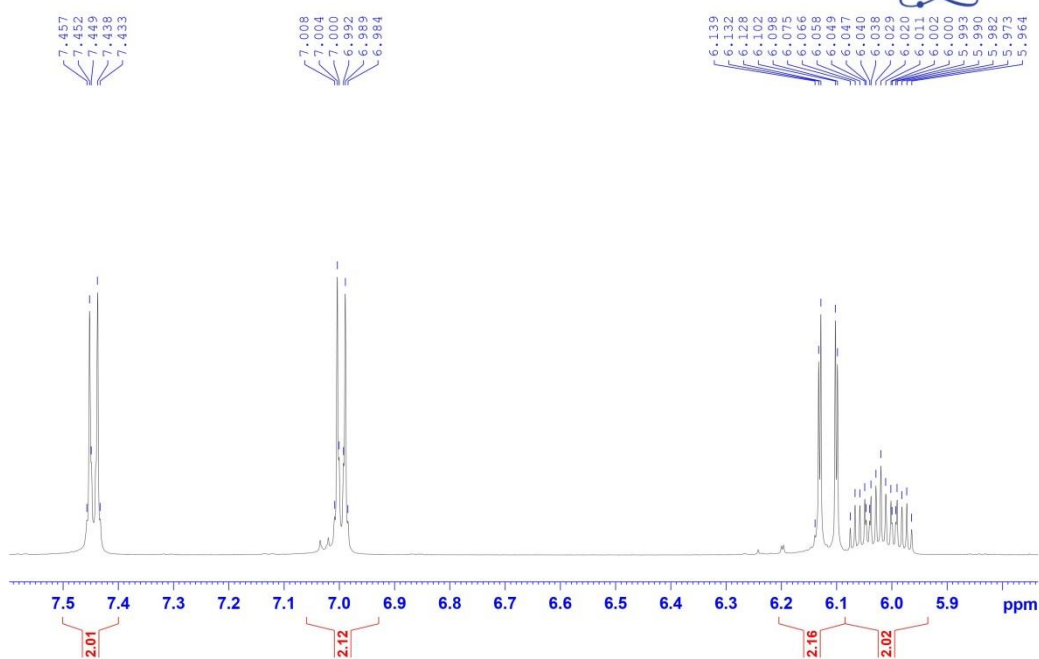

# $^{13}\text{C}$ -NMR

NDA-DMSO-C13CPD

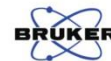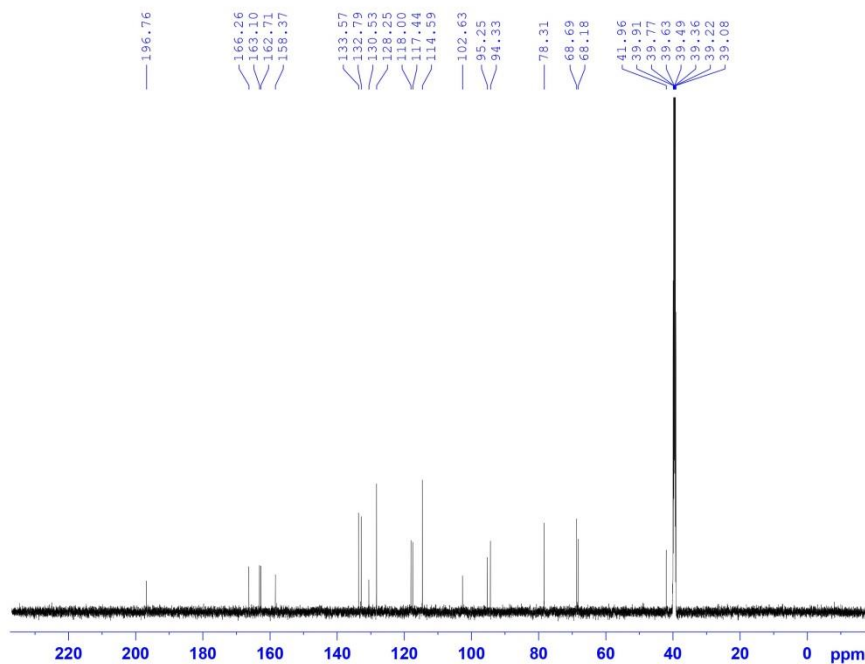

NDA-DMSO-C13CPD

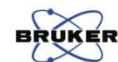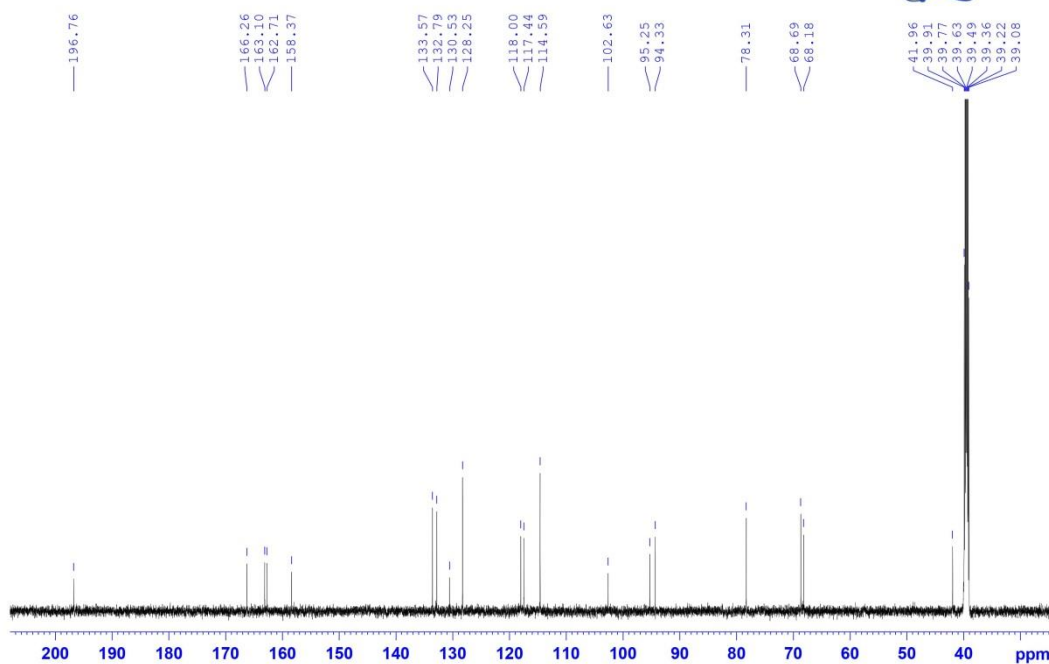

Supplement: f1 [file 4817900.f1.zip]
