# Supplementary material for: Synthesis and Evaluation of the Acetylcholinesterase Inhibitory Activities of Some Flavonoids Derived from Naringenin
Source: Hindawi journal article supplement (doi:10.1155/2021/4817900), 2021-11-30

**Table S5. Spectral data of compound 5**

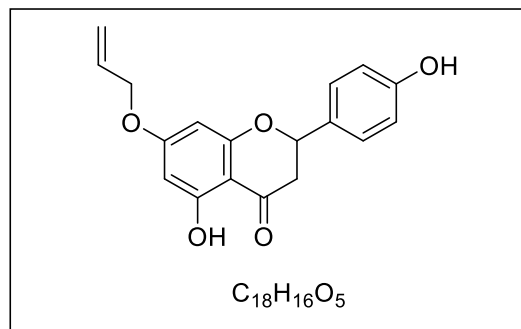

## UV

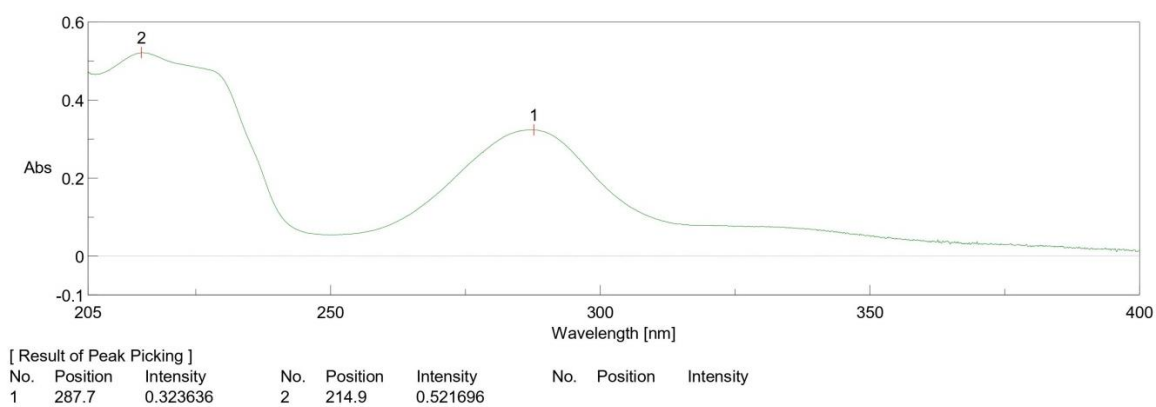

## IR

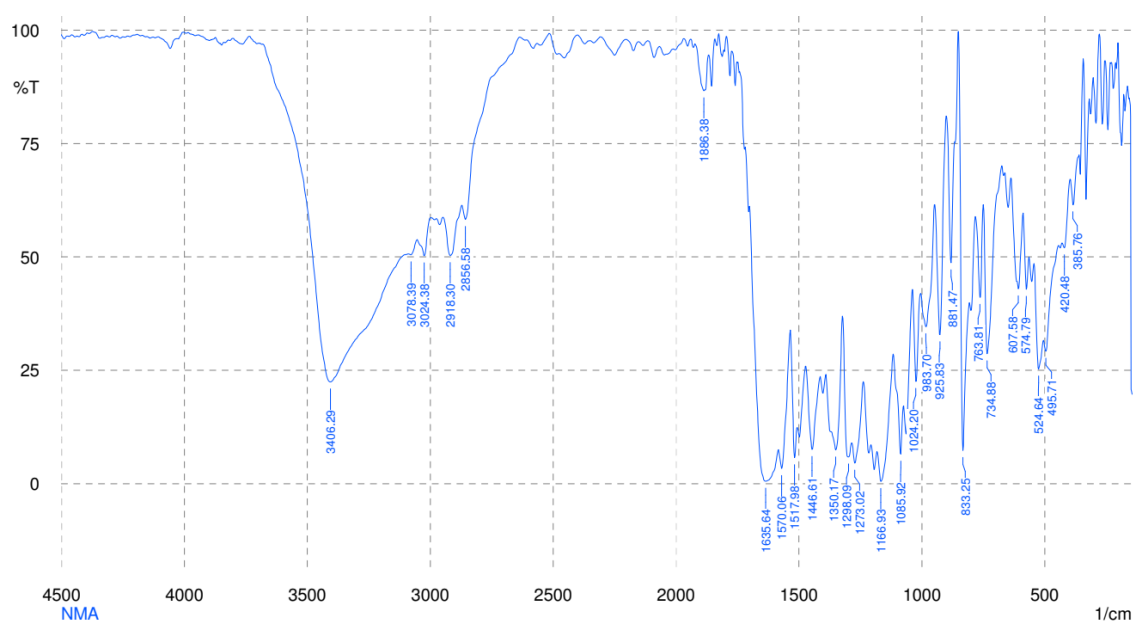

# HR-MS

## Qualitative Analysis Report

|                        |                       |                        |                                                       |
|------------------------|-----------------------|------------------------|-------------------------------------------------------|
| Data File              | NMA.d                 | Sample Name            | NMA                                                   |
| Sample Type            | Sample                | Position               | P1-A5                                                 |
| Instrument Name        | Instrument 1          | User Name              |                                                       |
| Acq Method             | Cot ngan - MSMS_Pos.m | Acquired Time          | 01/07/2021 3:23:13 PM                                 |
| IRM Calibration Status | Success               | DA Method              | COTNGAN.M.m                                           |
| Comment                |                       |                        |                                                       |
| Sample Group           |                       | Info.                  |                                                       |
| Stream Name            | LC 1                  | Acquisition SW Version | 6200 series TOF/6500 series Q-TOF B.06.01 (B6172 SP1) |

## User Chromatograms

Fragmentor Voltage 140 Collision Energy 0 Ionization Mode ESI

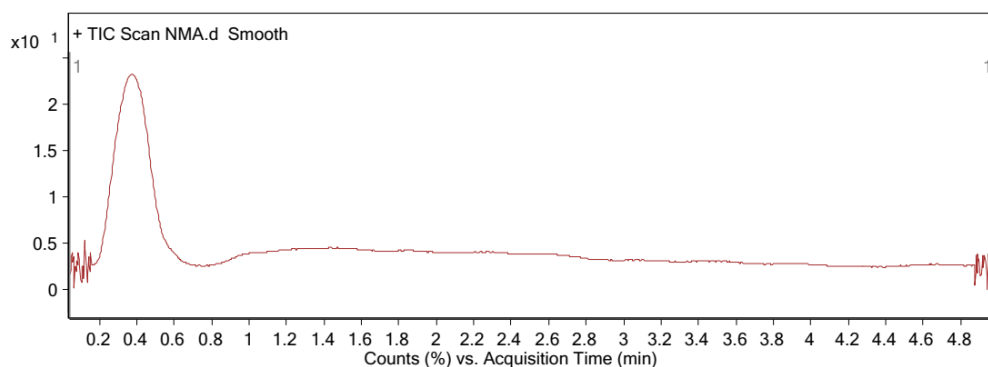

## Qualitative Analysis Report

## User Spectra

Fragmentor Voltage 140 Collision Energy 0 Ionization Mode ESI

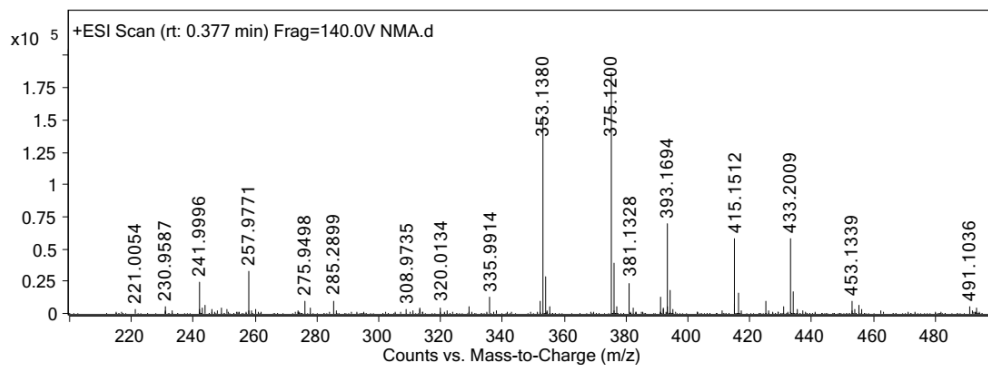

# $^1\text{H}$ -NMR

NMA-DMSO-1H

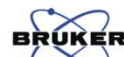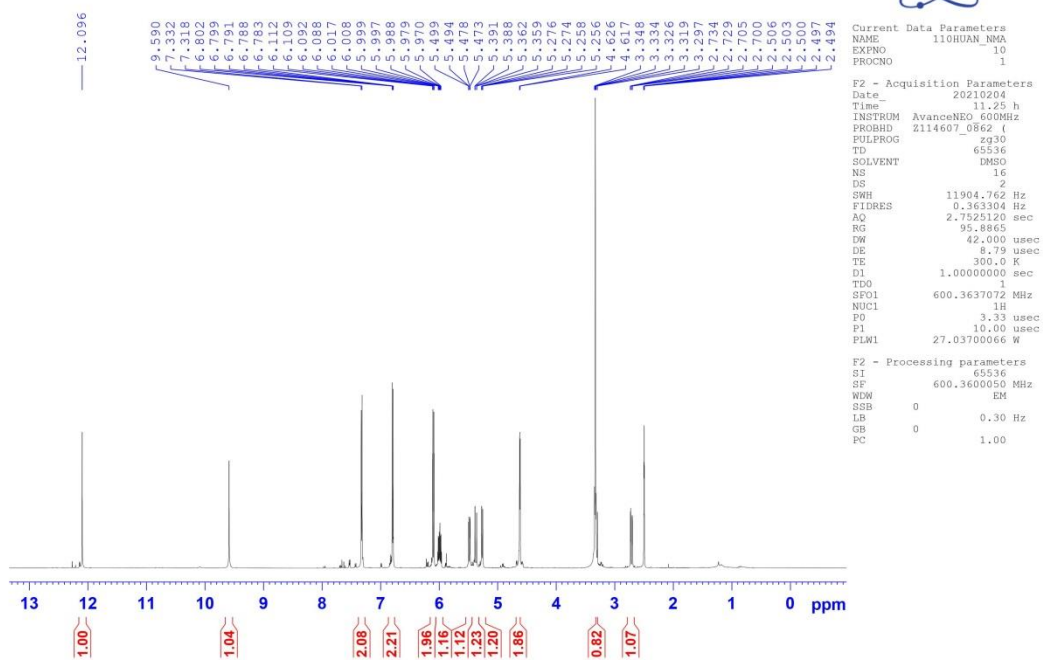

Current Data Parameters  
NAME 110HUA\_NMA  
EXPNO 10  
PROCNO 1

F2 - Acquisition Parameters  
Date 20210204  
Time 11:25 h  
INSTRUM AvanceNEO 600MHz  
PROBHD Z114607 0862 (z930)  
PULPROG zg30  
TD 65536  
SOLVENT DMSO  
NS 16  
DS 2  
SWH 11904.762 Hz  
FIDRES 0.363304 Hz  
AQ 2.7525120 sec  
RG 95.8865  
DW 42.000 usec  
DE 8.79 usec  
TE 300.0 K  
D1 1.00000000 sec  
TDO 1  
SFO1 600.3637072 MHz  
NUC1 1H  
P0 3.33 usec  
F1 10.00 usec  
FLM1 27.03700066 W

F2 - Processing parameters  
SI 65536  
SF 600.3600050 MHz  
WDW EM  
SSB 0  
LB 0.30 Hz  
GB 0  
PC 1.00

NMA-DMSO-1H

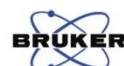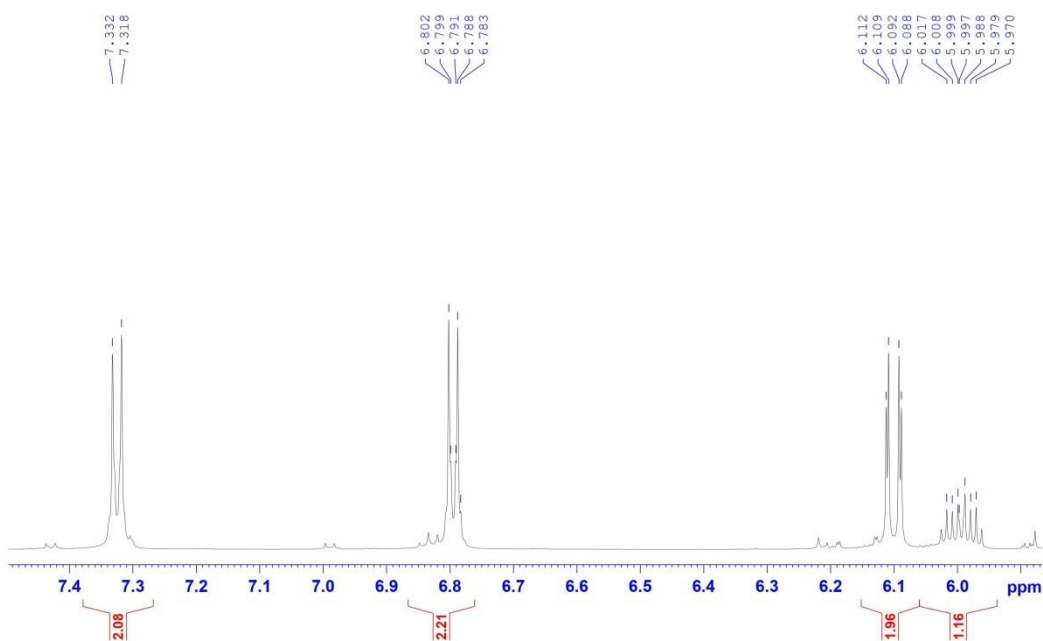

# $^{13}\text{C}$ -NMR

NMA-DMSO-C13CPD

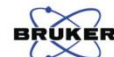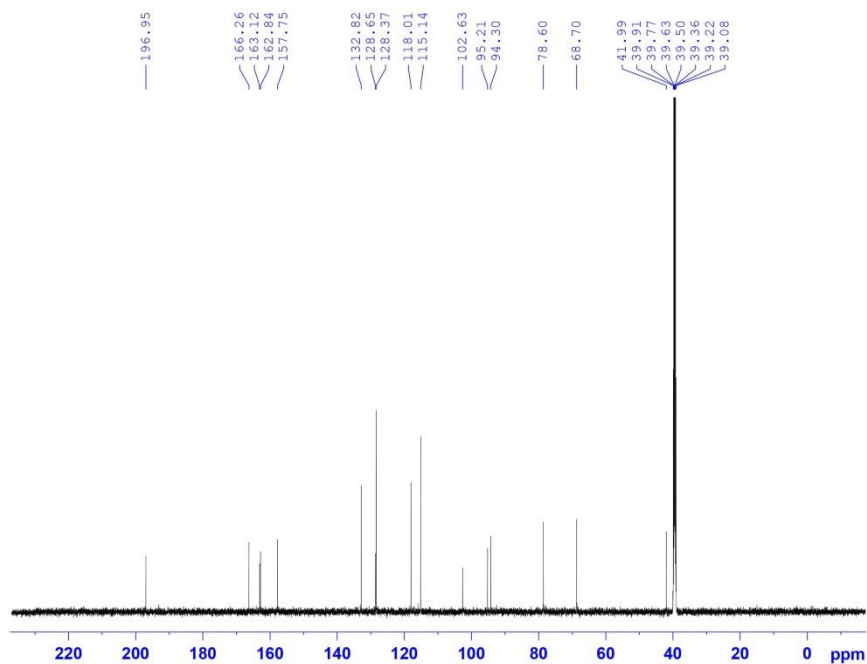

Current Data Parameters  
NAME 110HUN\_NMA  
EXPNO 2  
PROCNO 1

F2 - Acquisition Parameters  
Date\_ 20210207  
Time 17.55 h  
INSTRUM AvanceNEO 600MHz  
PROBHD Z114607.0862 (zpg30)  
PULPROG zgpg30  
TD 65536  
SOLVENT DMSO  
NS 512  
DS 4  
SWH 38461.539 Hz  
FIDRES 1.173753 Hz  
AQ 0.8519680 sec  
RG 101  
DW 13.000 usec  
DE 6.50 usec  
TE 300.0 K  
D1 2.00000000 sec  
D11 0.03000000 sec  
TD0 1  
SF01 150.9772477 MHz  
NUC1 13C  
P2 4.00 usec  
P1 12.00 usec  
PLM1 86.32800293 W  
SF02 600.3624014 MHz  
NUC2 1H  
CPDPRG2 waltz65  
PCPD2 70.00 usec  
PLM2 27.03700066 W  
PLM12 0.55177999 W  
PLM13 0.27754000 W

F2 - Processing parameters  
SI 32768  
SF 150.9607171 MHz  
WDW EM  
SSB 0  
LB 1.00 Hz  
GB 0  
PC 1.40

NMA-DMSO-C13CPD

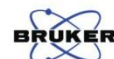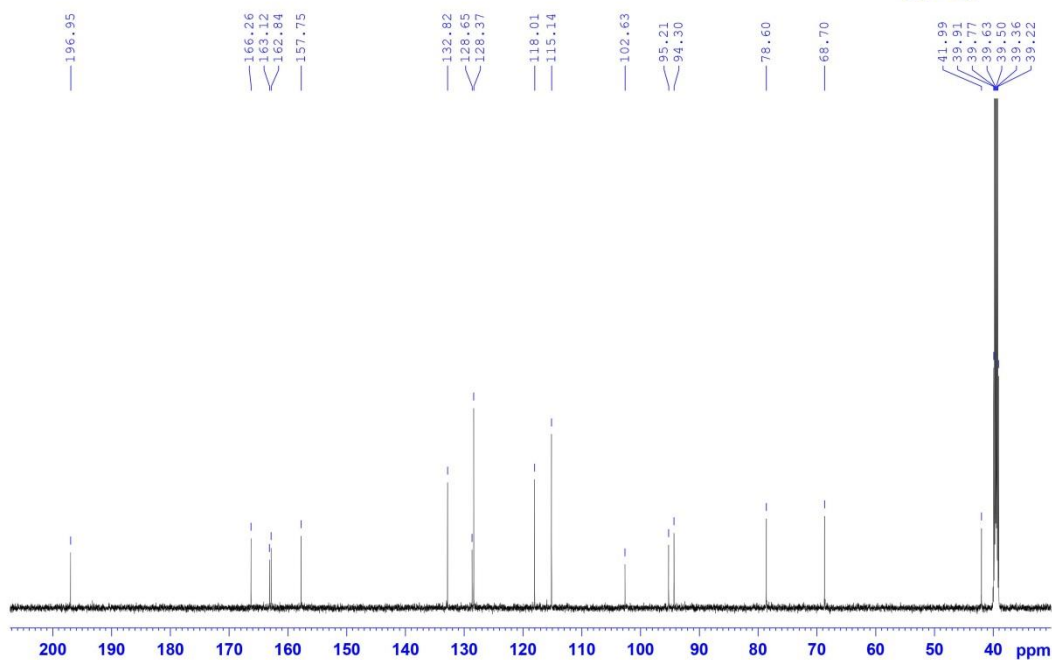

Supplement: f1 [file 4817900.f1.zip]
