# Supplementary material for: Synthesis and Evaluation of the Acetylcholinesterase Inhibitory Activities of Some Flavonoids Derived from Naringenin
Source: Hindawi journal article supplement (doi:10.1155/2021/4817900), 2021-11-30
Supplement: f1 [file 4817900.f1.zip]

**Table S11. Predicted toxicities of studied compounds by Pro Tox-II web server.**

| Classification                             | Target                                           | 1    |      | 2    |      | 3    |      | 4    |      | 5    |      | 6    |      | 7    |      | 8    |      | 9    |      | GAL  |      |
|--------------------------------------------|--------------------------------------------------|------|------|------|------|------|------|------|------|------|------|------|------|------|------|------|------|------|------|------|------|
|                                            |                                                  | Pred | Prob |
| Organ toxicity                             | Hepatotoxicity                                   | -    | 0.71 | -    | 0.69 | -    | 0.56 | -    | 0.74 | -    | 0.7  | -    | 0.73 | -    | 0.71 | -    | 0.75 | -    | 0.75 | -    | 0.93 |
| Toxicity end points                        | Carcinogenicity                                  | -    | 0.52 | -    | 0.5  | -    | 0.61 | -    | 0.67 | -    | 0.58 | -    | 0.53 | -    | 0.67 | -    | 0.66 | -    | 0.6  | -    | 0.65 |
| Toxicity end points                        | Immunotoxicity                                   | +    | 0.51 | +    | 0.61 | +    | 0.97 | +    | 0.96 | -    | 0.64 | +    | 0.5  | +    | 0.92 | +    | 0.77 | -    | 0.57 | +    | 0.98 |
| Toxicity end points                        | Mutagenicity                                     | -    | 0.62 | -    | 0.64 | -    | 0.7  | -    | 0.74 | -    | 0.62 | -    | 0.63 | -    | 0.77 | -    | 0.77 | -    | 0.72 | -    | 0.76 |
| Toxicity end points                        | Cytotoxicity                                     | -    | 0.71 | -    | 0.8  | -    | 0.64 | -    | 0.94 | -    | 0.7  | -    | 0.71 | -    | 0.91 | -    | 0.87 | -    | 0.89 | +    | 0.5  |
| Tox21-Nuclear receptor signalling pathways | Aryl hydrocarbon Receptor (AhR)                  | +    | 0.5  | +    | 0.5  | +    | 0.62 | -    | 0.68 | -    | 0.67 | -    | 0.74 | -    | 0.78 | -    | 0.79 | -    | 0.76 | +    | 1    |
| Tox21-Nuclear receptor signalling pathways | Androgen Receptor (AR)                           | -    | 0.96 | -    | 0.96 | -    | 0.98 | -    | 0.98 | -    | 0.83 | -    | 0.78 | -    | 0.92 | -    | 0.95 | -    | 0.95 | -    | 0.9  |
| Tox21-Nuclear receptor signalling pathways | Androgen Receptor Ligand Binding Domain (AR-LBD) | -    | 0.98 | -    | 0.99 | -    | 0.99 | -    | 0.99 | -    | 0.97 | -    | 0.98 | -    | 0.98 | -    | 0.99 | -    | 0.99 | -    | 0.99 |
| Tox21-Nuclear receptor signalling pathways | Aromatase                                        | -    | 0.78 | -    | 0.8  | -    | 0.85 | -    | 0.87 | -    | 0.79 | -    | 0.81 | -    | 0.88 | -    | 0.88 | -    | 0.88 | -    | 0.97 |
| Tox21-Nuclear receptor signalling pathways | Estrogen Receptor Alpha (ER)                     | +    | 0.68 | +    | 0.64 | +    | 0.65 | +    | 0.53 | -    | 0.51 | -    | 0.54 | +    | 0.59 | +    | 0.61 | +    | 0.54 | -    | 0.96 |

| Classification                             | Target                                                                                | 1    |      | 2    |      | 3    |      | 4    |      | 5    |      | 6    |      | 7    |      | 8    |      | 9    |      | GAL  |      |
|--------------------------------------------|---------------------------------------------------------------------------------------|------|------|------|------|------|------|------|------|------|------|------|------|------|------|------|------|------|------|------|------|
|                                            |                                                                                       | Pred | Prob |
| Tox21-Nuclear receptor signalling pathways | Estrogen Receptor Ligand Binding Domain (ER-LBD)                                      | +    | 0.56 | -    | 0.52 | -    | 0.74 | -    | 0.74 | -    | 0.78 | -    | 0.85 | -    | 0.76 | -    | 0.74 | -    | 0.9  | -    | 0.99 |
| Tox21-Nuclear receptor signalling pathways | Peroxisome Proliferator Activated Receptor Gamma (PPAR-Gamma)                         | -    | 0.71 | -    | 0.75 | -    | 0.93 | -    | 0.87 | -    | 0.73 | -    | 0.79 | -    | 0.87 | -    | 0.9  | -    | 0.93 | -    | 1    |
| Tox21-Stress response pathways             | Nuclear factor (erythroid-derived 2)-like 2/antioxidant responsive element (nrf2/ARE) | -    | 0.88 | -    | 0.89 | +    | 1    | -    | 0.57 | -    | 0.87 | -    | 0.83 | -    | 0.72 | -    | 0.74 | -    | 0.7  | -    | 0.93 |
| Tox21-Stress response pathways             | Heat shock factor response element (HSE)                                              | -    | 0.88 | -    | 0.89 | +    | 1    | -    | 0.57 | -    | 0.87 | -    | 0.83 | -    | 0.72 | -    | 0.74 | -    | 0.7  | -    | 0.93 |
| Tox21-Stress response pathways             | Mitochondrial Membrane Potential (MMP)                                                | +    | 0.69 | +    | 0.67 | +    | 0.69 | -    | 0.5  | -    | 0.56 | -    | 0.68 | -    | 0.5  | +    | 0.53 | -    | 0.55 | -    | 0.98 |
| Tox21-Stress response pathways             | Phosphoprotein (Tumor Suppressor) p53                                                 | -    | 0.72 | -    | 0.85 | -    | 0.76 | -    | 0.66 | -    | 0.7  | -    | 0.8  | -    | 0.68 | -    | 0.67 | -    | 0.73 | -    | 0.97 |

| Classification                 | Target                                                | 1    |      | 2    |      | 3    |      | 4    |      | 5    |      | 6    |      | 7    |      | 8    |      | 9    |      | GAL  |      |
|--------------------------------|-------------------------------------------------------|------|------|------|------|------|------|------|------|------|------|------|------|------|------|------|------|------|------|------|------|
|                                |                                                       | Pred | Prob |
| Tox21-Stress response pathways | ATPase family AAA domain-containing protein 5 (ATAD5) | +    | 0.51 | -    | 0.51 | -    | 0.79 | -    | 0.9  | -    | 0.81 | -    | 0.86 | -    | 0.8  | -    | 0.76 | -    | 0.8  | -    | 0.98 |
| Acute Oral Toxicity            | Predicted LD50 (mg/kg)                                | 2000 |      | 2000 |      | 3000 |      | 3800 |      | 2000 |      | 2000 |      | 3800 |      | 3800 |      | 3800 |      | 85   |      |
|                                | Predicted Toxicity Class                              | 4    |      | 4    |      | 5    |      | 5    |      | 4    |      | 4    |      | 5    |      | 5    |      | 5    |      | 3    |      |

+: active, -: inactive, Pred: predicted, Prob: probability, GAL: galantamine, LD50: median lethal dose, Tox21: Toxicology in the 21st Century (a unique collaboration between several US federal agencies to develop new ways to rapidly test whether substances adversely affect human health).
