# Supplementary material for: Synthesis and Evaluation of the Acetylcholinesterase Inhibitory Activities of Some Flavonoids Derived from Naringenin
Source: Hindawi journal article supplement (doi:10.1155/2021/4817900), 2021-11-30
Supplement: f1 [file 4817900.f1.zip]

**Table S10. Pharmacokinetics, drug-likeness and medicinal chemistry evaluation of studied compounds by SwissADME online service**

| Compound                      | 1                  | 2                  | 3                  | 4                  | 5                  | 6                  | 7                  | 8              | 9              | GAL      |
|-------------------------------|--------------------|--------------------|--------------------|--------------------|--------------------|--------------------|--------------------|----------------|----------------|----------|
| #Heavy atoms                  | 21                 | 22                 | 24                 | 26                 | 23                 | 26                 | 29                 | 41             | 48             | 21       |
| #Aromatic heavy atoms         | 12                 | 12                 | 12                 | 12                 | 12                 | 12                 | 12                 | 30             | 36             | 6        |
| Fraction Csp3                 | 0.19               | 0.24               | 0.21               | 0.29               | 0.17               | 0.19               | 0.12               | 0.08           | 0.09           | 0.53     |
| #Rotatable bonds              | 2                  | 3                  | 7                  | 9                  | 4                  | 7                  | 12                 | 12             | 15             | 1        |
| #H-bond acceptors             | 5                  | 5                  | 5                  | 5                  | 5                  | 5                  | 5                  | 5              | 5              | 4        |
| #H-bond donors                | 2                  | 1                  | 0                  | 1                  | 2                  | 1                  | 1                  | 1              | 0              | 1        |
| MR                            | 76.04              | 80.51              | 92.22              | 102.17             | 85.18              | 98.79              | 115.17             | 161.21         | 190.16         | 84.05    |
| TPSA                          | 75.99              | 64.99              | 53.99              | 64.99              | 75.99              | 64.99              | 64.99              | 64.99          | 53.99          | 41.93    |
| iLOGP                         | 2.41               | 2.36               | 3.49               | 3.71               | 2.61               | 3.74               | 3.82               | 4.3            | 5.56           | 2.66     |
| XLOGP3                        | 2.85               | 3.17               | 3.58               | 4.9                | 3.49               | 4.46               | 5.73               | 8.28           | 9.55           | 1.84     |
| WLOGP                         | 2.49               | 2.79               | 3.51               | 4.38               | 3.04               | 3.9                | 4.87               | 7.46           | 9.18           | 1.32     |
| MLOGP                         | 0.96               | 1.2                | 1.99               | 2.44               | 1.36               | 1.97               | 2.86               | 4.75           | 5.76           | 1.74     |
| Silicos-IT Log P              | 2.57               | 3.09               | 4.15               | 4.81               | 3.31               | 4.62               | 6.01               | 8.07           | 10.07          | 2.03     |
| Consensus Log P               | 2.25               | 2.52               | 3.34               | 4.05               | 2.76               | 3.74               | 4.66               | 6.57           | 8.03           | 1.92     |
| ESOL Log S                    | -3.7               | -3.9               | -4.04              | -4.88              | -4.1               | -4.71              | -5.4               | -8.17          | -9.34          | -2.93    |
| ESOL Solubility (mg/ml)       | 5.70E-02           | 3.74E-02           | 3.00E-02           | 4.65E-03           | 2.50E-02           | 6.81E-03           | 1.57E-03           | 3.67E-06       | 2.86E-07       | 3.41E-01 |
| ESOL Solubility (mol/l)       | 1.99E-04           | 1.25E-04           | 9.14E-05           | 1.31E-05           | 8.00E-05           | 1.93E-05           | 4.01E-06           | 6.76E-09       | 4.52E-10       | 1.19E-03 |
| ESOL Class                    | Soluble            | Soluble            | Moderately soluble | Moderately soluble | Moderately soluble | Moderately soluble | Moderately soluble | Poorly soluble | Poorly soluble | Soluble  |
| Ali Log S                     | -4.1               | -4.21              | -4.4               | -6                 | -4.77              | -5.54              | -6.86              | -9.51          | -10.6          | -2.34    |
| Ali Solubility (mg/ml)        | 2.25E-02           | 1.87E-02           | 1.31E-02           | 3.56E-04           | 5.32E-03           | 1.01E-03           | 5.39E-05           | 1.68E-07       | 1.61E-08       | 1.31E+00 |
| Ali Solubility (mol/l)        | 7.86E-05           | 6.23E-05           | 3.98E-05           | 9.98E-07           | 1.70E-05           | 2.86E-06           | 1.37E-07           | 3.10E-10       | 2.54E-11       | 4.56E-03 |
| Ali Class                     | Moderately soluble | Moderately soluble | Moderately soluble | Poorly soluble     | Moderately soluble | Moderately soluble | Poorly soluble     | Poorly soluble | Insoluble      | Soluble  |
| Silicos-IT LogSw              | -4.12              | -4.81              | -5.44              | -5.93              | -4.57              | -5.71              | -6.08              | -12.13         | -15.25         | -2.96    |
| Silicos-IT Solubility (mg/ml) | 2.19E-02           | 4.62E-03           | 1.20E-03           | 4.17E-04           | 8.44E-03           | 6.87E-04           | 3.26E-04           | 3.98E-10       | 3.53E-13       | 3.17E-01 |
| Silicos-IT Solubility (mol/l) | 7.66E-05           | 1.54E-05           | 3.65E-06           | 1.17E-06           | 2.70E-05           | 1.95E-06           | 8.30E-07           | 7.33E-13       | 5.57E-16       | 1.10E-03 |
| Silicos-IT class              | Moderately soluble | Poorly soluble     | Insoluble      | Insoluble      | Soluble  |
| GI absorption                 | High               | Low            | Low            | High     |
| BBB permeant                  | Yes                | No             | No             | Yes      |

| Compound                 | 1     | 2     | 3     | 4    | 5     | 6     | 7     | 8     | 9     | GAL   |
|--------------------------|-------|-------|-------|------|-------|-------|-------|-------|-------|-------|
| Pgp substrate            | No    | No    | No    | No   | No    | No    | No    | Yes   | Yes   | Yes   |
| CYP1A2 inhibitor         | Yes   | Yes   | Yes   | Yes  | Yes   | Yes   | Yes   | No    | No    | No    |
| CYP2C19 inhibitor        | Yes   | Yes   | Yes   | Yes  | Yes   | Yes   | No    | No    | No    | No    |
| CYP2C9 inhibitor         | No    | No    | Yes   | Yes  | Yes   | Yes   | Yes   | No    | No    | No    |
| CYP2D6 inhibitor         | No    | Yes   | Yes   | Yes  | Yes   | Yes   | No    | Yes   | No    | Yes   |
| CYP3A4 inhibitor         | Yes   | Yes   | Yes   | Yes  | Yes   | Yes   | Yes   | No    | No    | No    |
| log Kp (cm/s)            | -6.02 | -5.88 | -5.76 | -5   | -5.73 | -5.28 | -4.63 | -3.73 | -3.38 | -6.75 |
| Lipinski #violations     | 0     | 0     | 0     | 0    | 0     | 0     | 0     | 2     | 2     | 0     |
| Ghose #violations        | 0     | 0     | 0     | 0    | 0     | 0     | 0     | 4     | 4     | 0     |
| Veber #violations        | 0     | 0     | 0     | 0    | 0     | 0     | 1     | 1     | 1     | 0     |
| Egan #violations         | 0     | 0     | 0     | 0    | 0     | 0     | 0     | 1     | 1     | 0     |
| Muegge #violations       | 0     | 0     | 0     | 0    | 0     | 0     | 1     | 1     | 2     | 0     |
| Bioavailability Score    | 0.55  | 0.55  | 0.55  | 0.55 | 0.55  | 0.55  | 0.55  | 0.17  | 0.17  | 0.55  |
| PAINS #alerts            | 0     | 0     | 0     | 0    | 0     | 0     | 0     | 0     | 0     | 0     |
| Brenk #alerts            | 0     | 0     | 1     | 1    | 1     | 1     | 2     | 1     | 1     | 1     |
| Leadlikeness #violations | 0     | 0     | 1     | 3    | 0     | 2     | 3     | 3     | 3     | 0     |
| Synthetic Accessibility  | 3.11  | 3.22  | 2.98  | 3.3  | 3.29  | 3.54  | 3.46  | 4.17  | 4.69  | 4.57  |

#: number, GI: gastrointestinal, BBB: blood–brain barrier , PAINS: pan-assay interference compounds.
