# Supplementary material for: Synthesis and Evaluation of the Acetylcholinesterase Inhibitory Activities of Some Flavonoids Derived from Naringenin
Source: Hindawi journal article supplement (doi:10.1155/2021/4817900), 2021-11-30
Supplement: f1 [file 4817900.f1.zip]

**Figure S4. Mode of ligand interaction of naringenin with AChE**

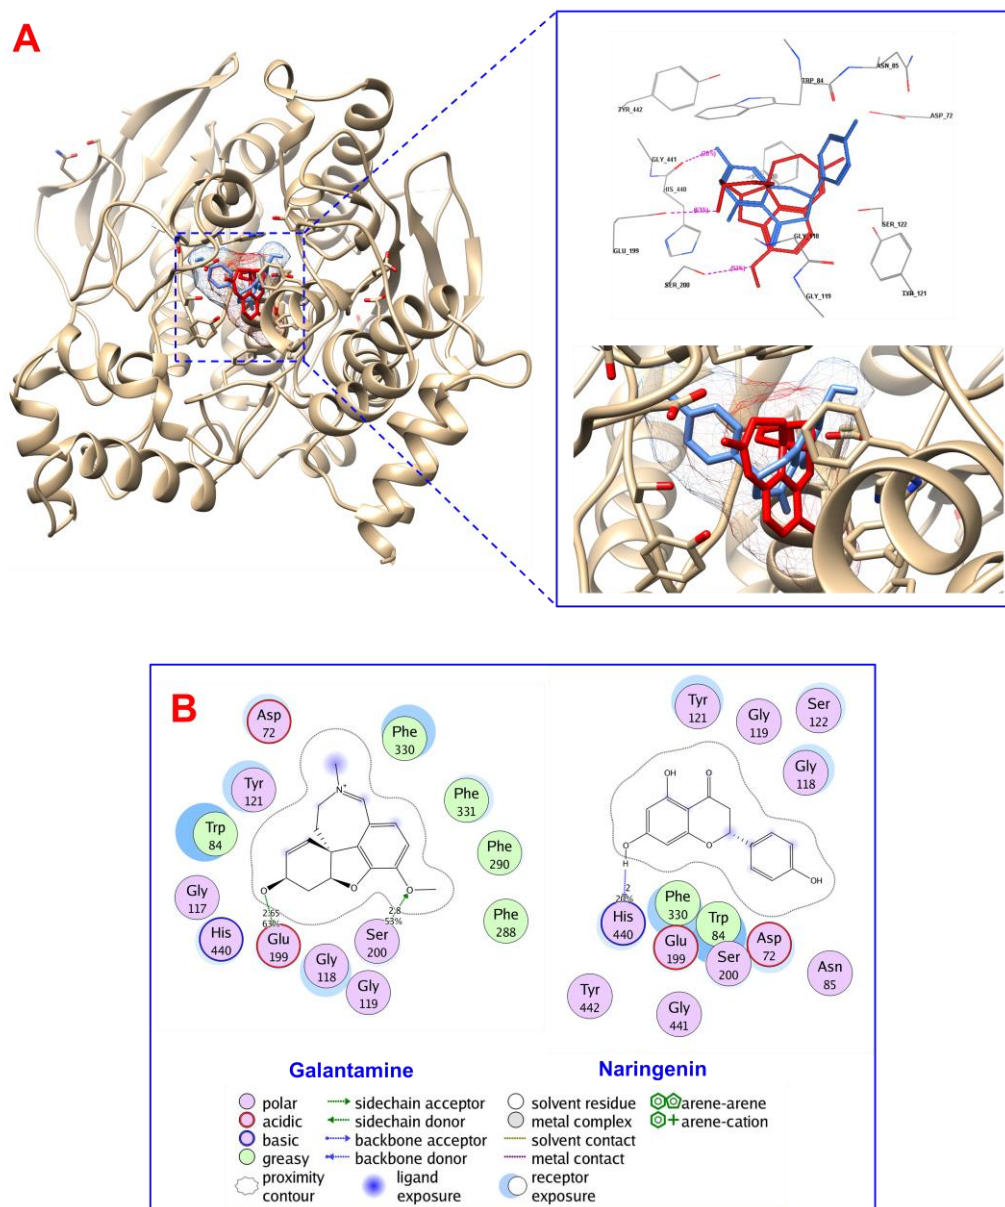

A. Alignment of docked pose of naringenin with galantamine as co-crystallized ligand in the AChE complex (PDB ID: 1W6R). Naringenin is rendered in cornflower blue, and galantamine is rendered in red.

B. Mode of interaction of galantamine and naringenin with the enzyme AChE (depicted in two-dimensional format)

Asn: asparagine, Asp: aspartate, Gln: glutamine, Glu: glutamate, Gly: glycine, His: histidine, Ile: isoleucine, Phe: phenylalanine, Ser: serine, Trp: tryptophan, Tyr: tyrosine.
