# Supplementary material for: Synthesis and Evaluation of the Acetylcholinesterase Inhibitory Activities of Some Flavonoids Derived from Naringenin
Source: ScientificWorldJournal. 2021 Nov 30;2021:4817900. doi: 10.1155/2021/4817900 (PMC8651387; doi:10.1155/2021/4817900)
Supplement: Supplementary Materials — Tables S1–S9: spectral data of compounds 1–9. Figure S1: mode of ligand interaction of compound 2 with AChE. Figure S2: mode of ligand interaction of compound 4 with AChE. Figure S3: mode of ligand interaction of compound 5 with AChE. Figure S4: mode of ligand interaction of naringenin with AChE. Table S10: pharmacokinetics, drug-likeness, and medicinal chemistry evaluation of studied compounds by SwissADME online service. Table S11: predicted toxicities of studied compounds by ProTox-II web server. [file 4817900.f1.zip]

Archive with 15 entries (15 files):
- 4817900.f1/Figure S1. Mode of ligand interaction of compound 2 with AChE.pdf
- 4817900.f1/Figure S2. Mode of ligand interaction of compound 4 with AChE.pdf
- 4817900.f1/Figure S3. Mode of ligand interaction of compound 5 with AChE.pdf
- 4817900.f1/Figure S4. Mode of ligand interaction of naringenin with AChE.pdf
- 4817900.f1/Table S1. Spectral data of compound 1.pdf
- 4817900.f1/Table S10. Pharmacokinetics, drug-likeness and medicinal chemistry evaluation of studied compounds by SwissADME online service..pdf
- 4817900.f1/Table S11. Predicted toxicities of studied compounds by Pro Tox-II web server.pdf
- 4817900.f1/Table S2. Spectral data of compound 2.pdf
- 4817900.f1/Table S3. Spectral data of compound 3.pdf
- 4817900.f1/Table S4. Spectral data of compound 4.pdf
- 4817900.f1/Table S5. Spectral data of compound 5.pdf
- 4817900.f1/Table S6. Spectral data of compound 6.pdf
- 4817900.f1/Table S7. Spectral data of compound 7.pdf
- 4817900.f1/Table S8. Spectral data of compound 8.pdf
- 4817900.f1/Table S9. Spectral data of compound 9.pdf
